# Supplementary material for: Estimation of rearrangement phylogeny for cancer genomes
Source: HighWire-hosted journal article supplement (doi:10.1101/gr.118414.110), 2011-10-12
Supplement: Supplementary_Data.xlsx [file Supplementary_Data.xlsx]

## Sheet: NCI-209 Muts
Chromosome	Position	WT	Mut	Multiplicity
1	1041697	CC	A	1
1	1363778	AA	T	1
1	1820111	GG	A	1
1	2381534	GG	T	1
1	3021064	GG	T	1
1	3122222	GG	C	1
1	3381838	CC	T	1
1	3666256	CC	A	1
1	4329387	GG	C	1
1	4413795	GG	T	1
1	4698546	CC	T	1
1	4704923	CC	T	1
1	5835782	GG	A	1
1	5949398	CC	T	1
1	6039784	GG	T	1
1	7061860	AA	T	1
1	8163441	TT	A	1
1	9412476	GG	C	1
1	10415848	CC	A	1
1	10766343	CC	G	1
1	12611016	AA	G	1
1	13988793	GG	T	1
1	14622862	GG	A	1
1	14810185	GG	A	1
1	15027533	CC	A	1
1	15816569	CC	T	1
1	16024820	TT	C	1
1	16025724	CC	A	1
1	16413112	GG	A	1
1	17946628	CC	T	1
1	18105639	GG	A	1
1	18201571	CC	A	1
1	18951588	CC	T	1
1	19234109	GG	A	1
1	20213911	TT	C	1
1	20401735	TT	C	1
1	20480640	CC	A	1
1	20653219	TT	C	1
1	21971604	GG	A	1
1	22303679	TT	C	1
1	22354030	GG	A	1
1	23305682	CC	T	1
1	23741786	CC	A	1
1	24339870	GG	A	1
1	24392921	GG	C	1
1	24634168	GG	T	1
1	24678349	AA	G	1
1	26157604	CC	A	1
1	26759554	AA	G	1
1	26852038	GG	T	1
1	28925434	AA	G	1
1	29222646	CC	AC	1
1	29308744	AA	AG	1
1	29564881	TT	AT	1
1	29663994	GG	CG	1
1	29724093	GG	GT	1
1	29898985	CC	AC	1
1	30146369	GG	AAAG	3
1	30201258	GG	AAAG	3
1	30561698	GG	AGGG	1
1	30833790	GG	CGGG	1
1	31191354	GG	GGGT	1
1	31677293	TT	GTTT	1
1	31677302	TT	GTTT	1
1	31751578	GG	AGGG	1
1	31807795	CC	CCTT	2
1	32503386	TT	CCTT	2
1	32553544	TT	AAAT	3
1	32958136	GG	AAAG	3
1	33204748	TT	ATTT	1
1	33275686	CC	CCTT	2
1	33703790	AA	AAAT	1
1	34147973	CC	AAAC	3
1	34552973	AA	AAAG	1
1	34596920	CC	ACCC	1
1	34666704	GG	GGGT	1
1	34745305	CC	AAAC	3
1	34781768	AA	ATTT	3
1	34987486	AA	AAAT	1
1	35158893	CC	CCCT	1
1	35174461	CC	ACCC	1
1	35633093	AA	AGGG	3
1	36237977	AA	AAAG	1
1	36382324	AA	ACCC	3
1	36689598	CC	CCCT	1
1	37056219	GG	CCGG	2
1	37197670	TT	CTTT	1
1	37202954	CC	CTTT	3
1	37328599	CC	CGGG	3
1	37528517	TT	CCCT	3
1	37615490	GG	GTTT	3
1	37694980	CC	CTTT	3
1	38272408	GG	GGGT	1
1	38517032	TT	CCCT	3
1	38806316	GG	GGTT	2
1	39216089	CC	CCCG	1
1	39653689	GG	GTTT	3
1	39948876	CC	CCCT	1
1	40021827	AA	AGGG	3
1	40199049	GG	GGGT	1
1	41177607	CC	CG	1
1	41431170	CC	AC	1
1	41458347	TT	CT	1
1	41514593	GG	GT	1
1	41611523	GG	GT	1
1	42007552	GG	CG	1
1	42392375	CC	CCGG	2
1	42392794	CC	AACC	2
1	42393548	CC	CCGG	2
1	42394041	CC	AACC	2
1	42996075	CC	CTT	2
1	43911682	CC	CCT	1
1	44339798	GG	A	1
1	44906439	CC	A	1
1	47742500	CC	G	1
1	47980910	TT	C	1
1	48260946	TT	A	1
1	48510824	CC	G	1
1	48584323	CC	CGG	2
1	48584362	CC	CTT	2
1	48723475	AA	AGG	2
1	49293630	CC	AAC	2
1	50048649	CC	AAC	2
1	50101671	CC	CCT	1
1	50306831	GG	GTT	2
1	50436147	TT	CTT	1
1	50499159	TT	CCT	2
1	50806965	TT	ATT	1
1	51173251	CC	ACC	1
1	51316837	AA	G	1
1	52250957	AA	T	1
1	52683590	CC	A	1
1	52690892	CC	G	1
1	52693832	CC	G	1
1	54165933	AA	T	1
1	54867072	AA	AG	1
1	55180804	GG	GT	1
1	55203388	TT	CT	1
1	55790804	TT	GT	1
1	55827775	CC	CT	1
1	55994227	GG	GT	1
1	56354326	AA	AG	1
1	56380779	CC	AC	1
1	56751177	TT	AT	1
1	57161151	AA	AC	1
1	57673937	GG	AG	1
1	57749775	CC	AC	1
1	57811476	TT	AT	1
1	58232839	GG	GT	1
1	58274289	GG	GT	1
1	58280413	AA	AG	1
1	58638523	CC	CT	1
1	58700370	TT	CT	1
1	58781467	TT	CT	1
1	59194788	CC	CG	1
1	59381251	GG	AG	1
1	60165759	AA	AG	1
1	60272590	GG	AG	1
1	60373469	GG	AG	1
1	60904959	TT	CT	1
1	60984737	GG	GT	1
1	61036497	CC	AC	1
1	61119924	AA	AG	1
1	61165106	TT	AT	1
1	62127406	GG	GT	1
1	62494081	TT	AT	1
1	62512605	TT	CT	1
1	62856526	AA	AC	1
1	62910567	TT	CT	1
1	62933650	TT	AT	1
1	63077144	AA	AT	1
1	63369952	TT	AT	1
1	63405636	CC	AC	1
1	63599002	GG	GT	1
1	63612744	GG	CG	1
1	63694005	AA	AG	1
1	64463243	TT	AT	1
1	64554161	TT	AT	1
1	64697629	GG	GT	1
1	64988860	CC	CG	1
1	65188218	CC	AC	1
1	65586992	GG	AG	1
1	65776698	GG	GT	1
1	65953867	GG	GT	1
1	65978488	GG	GT	1
1	66169731	TT	CT	1
1	66358826	CC	CT	1
1	66465236	TT	CT	1
1	67018926	GG	AG	1
1	67055054	CC	AC	1
1	67310580	CC	AC	1
1	67430414	CC	CG	1
1	67488542	TT	CT	1
1	67770290	AA	AC	1
1	67849562	AA	AG	1
1	67967602	CC	CT	1
1	68172342	TT	CT	1
1	68260776	AA	AG	1
1	68349282	CC	CG	1
1	68854461	CC	AC	1
1	68953766	TT	CT	1
1	69133283	CC	CT	1
1	69212231	TT	AT	1
1	69213397	AA	AG	1
1	69246982	AA	AT	1
1	69285522	CC	AC	1
1	69409341	GG	AG	1
1	69466430	CC	CT	1
1	69548194	GG	GT	1
1	69556539	AA	AT	1
1	69581495	TT	CT	1
1	69587205	AA	AC	1
1	69640808	CC	CT	1
1	69641788	AA	AG	1
1	69663675	CC	CG	1
1	69691876	AA	AG	1
1	69758751	AA	AC	1
1	69803745	AA	AG	1
1	69908394	GG	GT	1
1	69979528	TT	AT	1
1	70026518	CC	AC	1
1	70054177	AA	AT	1
1	70298452	AA	AG	1
1	70539306	TT	CT	1
1	70600222	GG	AG	1
1	70662657	GG	GT	1
1	70808232	CC	AC	1
1	70814695	GG	GT	1
1	70848715	CC	CG	1
1	70901377	GG	GT	1
1	71200186	CC	AC	1
1	71505297	GG	GT	1
1	71632532	CC	CT	1
1	71773926	CC	AC	1
1	71822365	TT	AT	1
1	71896280	TT	GT	1
1	71929041	AA	AG	1
1	72213570	GG	GT	1
1	72284222	CC	AC	1
1	72351914	GG	GT	1
1	72408396	CC	AC	1
1	72505942	CC	CG	1
1	72638789	AA	AC	1
1	72645790	GG	AG	1
1	72697208	TT	AT	1
1	72793398	GG	AG	1
1	72795594	GG	GT	1
1	72825247	AA	AT	1
1	72893694	GG	AG	1
1	72940242	CC	AC	1
1	73048422	CC	AC	1
1	73094961	GG	AG	1
1	73117505	CC	CT	1
1	73199303	GG	GT	1
1	73219607	TT	AT	1
1	73318559	AA	AG	1
1	73352025	GG	CG	1
1	73455840	GG	GT	1
1	73507469	TT	CT	1
1	73552237	CC	AC	1
1	73559508	GG	CG	1
1	73644329	CC	AC	1
1	73681993	GG	CG	1
1	73698478	GG	GT	1
1	73883458	GG	GT	1
1	73883654	CC	CT	1
1	73902193	GG	GT	1
1	73931521	GG	GT	1
1	73994040	TT	CT	1
1	74114957	CC	AC	1
1	74171402	CC	AC	1
1	74176238	AA	AT	1
1	74187552	TT	CT	1
1	74198960	CC	AC	1
1	74412225	CC	AC	1
1	74463070	AA	AG	1
1	74607562	AA	AG	1
1	74630579	GG	GT	1
1	74671689	TT	AT	1
1	74880193	AA	AG	1
1	75051031	AA	AT	1
1	75153368	AA	AC	1
1	75190512	GG	GT	1
1	75209925	TT	CT	1
1	75237574	TT	CT	1
1	75255136	CC	AC	1
1	75294936	CC	AC	1
1	75364614	TT	AT	1
1	75431934	AA	AG	1
1	75450050	GG	GT	1
1	75474176	TT	CT	1
1	75747040	CC	CG	1
1	75752417	TT	CT	1
1	75780317	GG	CG	1
1	75835880	CC	AC	1
1	75949210	TT	GT	1
1	76091306	CC	CT	1
1	76114072	GG	GT	1
1	76140576	AA	AT	1
1	76258611	GG	AG	1
1	76391753	GG	AG	1
1	76397417	GG	GT	1
1	76442558	CC	AC	1
1	76493463	CC	AC	1
1	76607106	GG	GT	1
1	76623104	GG	GT	1
1	76639725	CC	AC	1
1	76649492	GG	GT	1
1	76677021	GG	GT	1
1	76687234	GG	CG	1
1	76922233	TT	GT	1
1	76959759	AA	AT	1
1	76970879	GG	AG	1
1	77023071	AA	AG	1
1	77045637	CC	CG	1
1	77093150	GG	GT	1
1	77172083	GG	AG	1
1	77299295	CC	AC	1
1	77445154	TT	GT	1
1	77448057	TT	CT	1
1	77487685	CC	CT	1
1	77501162	CC	CT	1
1	77512656	CC	AC	1
1	77655428	CC	AC	1
1	77666831	GG	GT	1
1	77779482	GG	GT	1
1	77847404	CC	CT	1
1	77940770	AA	AT	1
1	77953882	TT	CT	1
1	78388138	AA	AG	1
1	78437025	CC	AC	1
1	78591201	GG	GT	1
1	78680453	AA	AT	1
1	78752422	GG	AG	1
1	78772475	AA	AG	1
1	78870854	CC	CT	1
1	78924958	AA	AG	1
1	78998462	TT	CT	1
1	79062879	AA	AT	1
1	79066435	CC	AC	1
1	79111822	CC	AC	1
1	79113434	CC	AC	1
1	79172270	CC	AC	1
1	79178180	GG	AG	1
1	79184255	GG	GT	1
1	79228741	AA	AG	1
1	79270982	GG	CG	1
1	79289310	GG	GT	1
1	79305182	GG	GT	1
1	79358424	AA	AT	1
1	79360136	TT	CT	1
1	79378798	GG	GT	1
1	79384944	CC	AC	1
1	79434422	GG	AG	1
1	79500880	TT	CT	1
1	79539234	GG	AG	1
1	79566867	AA	AC	1
1	79658987	GG	GT	1
1	79707717	GG	AG	1
1	79832417	CC	AC	1
1	79867710	GG	CG	1
1	79873693	CC	AC	1
1	79979838	GG	CG	1
1	80008248	GG	GT	1
1	80145716	GG	GT	1
1	80148171	CC	AC	1
1	80159992	GG	AG	1
1	80193897	GG	AG	1
1	80331496	TT	AT	1
1	80338956	CC	AC	1
1	80341879	GG	GT	1
1	80379190	CC	CG	1
1	80515747	CC	AC	1
1	80626222	AA	AG	1
1	80643450	GG	GT	1
1	80644339	GG	CG	1
1	80882503	GG	CG	1
1	80933222	CC	AC	1
1	81082256	CC	AC	1
1	81124652	TT	CT	1
1	81130646	CC	AC	1
1	81229541	GG	GT	1
1	81385827	TT	AT	1
1	81436588	GG	GT	1
1	81442514	TT	AT	1
1	81461784	CC	AC	1
1	81463254	CC	CG	1
1	81482278	GG	CG	1
1	81582245	TT	CT	1
1	81722682	AA	AG	1
1	81757029	CC	CT	1
1	81834221	CC	CT	1
1	82278068	TT	CT	1
1	82486702	TT	GT	1
1	82734973	CC	AC	1
1	82814541	GG	AG	1
1	83077000	CC	AC	1
1	83298744	TT	AT	1
1	83364910	GG	AG	1
1	83832729	CC	AC	1
1	84246772	CC	CT	1
1	84501099	GG	AG	1
1	84556164	CC	AC	1
1	84995030	GG	AG	1
1	85054203	AA	AG	1
1	85494875	CC	CT	1
1	85937528	GG	AG	1
1	85939810	TT	AT	1
1	86057689	TT	CT	1
1	86220148	GG	CG	1
1	86362295	AA	AT	1
1	86387964	CC	CG	1
1	86410403	AA	AG	1
1	86881596	CC	CT	1
1	86899010	GG	CG	1
1	87002261	CC	AC	1
1	87375237	GG	AG	1
1	87384770	GG	AG	1
1	87504642	TT	GT	1
1	87505741	AA	AT	1
1	87797694	CC	AC	1
1	87942638	TT	AT	1
1	87983751	CC	AC	1
1	88037967	GG	AG	1
1	88122937	CC	CT	1
1	88161990	GG	CG	1
1	88492594	GG	GT	1
1	88522479	TT	CT	1
1	88525638	CC	AC	1
1	88614661	TT	AT	1
1	88633018	CC	AC	1
1	88634949	TT	CT	1
1	89240053	CC	AC	1
1	89392453	AA	AC	1
1	89399206	CC	CG	1
1	89796574	GG	CG	1
1	89899655	AA	AG	1
1	89967305	GG	CG	1
1	90022162	AA	AG	1
1	90054763	TT	AT	1
1	90288199	GG	GT	1
1	90318196	CC	AC	1
1	90481726	CC	AC	1
1	90492385	CC	AC	1
1	90744909	GG	GT	1
1	90859124	TT	CT	1
1	91055923	CC	AC	1
1	91183225	GG	GT	1
1	91392856	AA	AT	1
1	91426824	TT	GT	1
1	91602446	TT	CT	1
1	91622115	TT	AT	1
1	91725949	CC	AC	1
1	92397512	GG	CG	1
1	92448771	GG	GT	1
1	92462422	TT	AT	1
1	92467551	GG	GT	1
1	92476510	TT	CT	1
1	92652918	GG	CG	1
1	92656450	GG	GT	1
1	92902053	TT	CT	1
1	93243943	TT	CT	1
1	93703184	CC	AC	1
1	94167775	AA	AT	1
1	94239354	CC	AC	1
1	94541142	TT	CT	1
1	94575610	GG	AG	1
1	94803336	AA	AG	1
1	95358365	GG	GT	1
1	95508561	AA	AG	1
1	95587532	GG	GT	1
1	95604609	TT	CT	1
1	95799318	GG	CG	1
1	95960995	AA	AT	1
1	95999636	GG	GT	1
1	96140208	GG	CG	1
1	96142101	TT	CT	1
1	96349595	CC	AC	1
1	96418670	CC	CT	1
1	96568314	CC	AC	1
1	96635045	AA	AG	1
1	96665711	GG	GT	1
1	96681800	TT	AT	1
1	96702192	TT	CT	1
1	96812766	GG	AG	1
1	97029275	GG	GT	1
1	97345227	CC	AC	1
1	97482664	GG	AG	1
1	97670498	TT	AT	1
1	97912130	CC	AC	1
1	97932363	TT	CT	1
1	97972779	CC	AC	1
1	98047196	AA	AT	1
1	98188208	CC	AC	1
1	98199186	AA	AC	1
1	98205623	TT	CT	1
1	98219705	GG	AG	1
1	98276452	GG	AG	1
1	98377767	CC	CT	1
1	98449319	CC	AC	1
1	98621274	GG	GT	1
1	98666253	TT	AT	1
1	98668113	CC	CT	1
1	98687276	CC	AC	1
1	98787844	GG	CG	1
1	98811880	AA	AG	1
1	98856028	GG	CG	1
1	98858391	GG	CG	1
1	98982630	CC	AC	1
1	99054140	CC	CT	1
1	99159176	AA	AT	1
1	99163100	AA	AT	1
1	99218665	CC	AC	1
1	99229700	CC	CT	1
1	99295561	AA	AT	1
1	99303993	GG	CG	1
1	99348582	CC	AC	1
1	99408980	CC	AC	1
1	99533226	AA	AG	1
1	99597648	CC	CT	1
1	99941093	CC	AC	1
1	100205183	GG	AG	1
1	100322200	GG	AG	1
1	100425741	AA	AT	1
1	100913498	GG	CG	1
1	101041864	AA	AC	1
1	101357433	TT	CT	1
1	101426360	CC	AC	1
1	101579047	GG	AG	1
1	101689251	AA	AT	1
1	101709760	GG	GT	1
1	101746969	CC	CT	1
1	101786010	TT	GT	1
1	101946596	TT	AT	1
1	102000730	AA	AT	1
1	102070288	CC	CG	1
1	102179862	CC	CG	1
1	102262010	GG	GT	1
1	102456529	CC	AC	1
1	102549297	GG	GT	1
1	102551137	TT	AT	1
1	102620773	CC	AC	1
1	102687586	TT	CT	1
1	102748453	TT	GT	1
1	102757653	GG	GT	1
1	102777439	CC	CG	1
1	102796442	CC	CT	1
1	102897075	TT	CT	1
1	102947869	TT	AT	1
1	103021620	AA	AT	1
1	103249284	CC	CT	1
1	103490121	TT	AT	1
1	103534799	GG	GT	1
1	104165269	CC	AC	1
1	104198026	GG	CG	1
1	104210832	CC	AC	1
1	104274851	CC	AC	1
1	104301757	TT	CT	1
1	104321417	CC	AC	1
1	104400703	CC	AC	1
1	104429645	GG	CG	1
1	104434186	TT	AT	1
1	104480963	AA	AT	1
1	104659206	AA	AT	1
1	104680198	GG	GT	1
1	104947410	CC	AC	1
1	105096326	CC	AC	1
1	105119935	CC	AC	1
1	105160302	GG	GT	1
1	105196728	CC	AC	1
1	105198819	CC	CG	1
1	105211792	GG	GT	1
1	105255425	CC	CG	1
1	105279516	AA	AT	1
1	105534011	TT	AT	1
1	105552857	CC	AC	1
1	105560892	GG	CG	1
1	105604867	AA	AG	1
1	105616044	AA	AT	1
1	105642839	GG	GT	1
1	105658731	TT	CT	1
1	105771166	TT	CT	1
1	105846971	CC	CG	1
1	105932219	TT	CT	1
1	105995747	TT	GT	1
1	105996350	TT	AT	1
1	106025768	CC	AC	1
1	106043627	TT	CT	1
1	106213241	CC	CT	1
1	106345169	CC	CG	1
1	106421559	CC	AC	1
1	106490900	CC	AC	1
1	106569019	AA	AG	1
1	106569363	AA	AG	1
1	106688626	GG	CG	1
1	106806254	AA	AT	1
1	107244007	GG	AG	1
1	107270864	GG	AG	1
1	107563110	GG	GT	1
1	107693814	AA	AG	1
1	108146168	GG	GT	1
1	108157373	CC	CT	1
1	108220673	CC	AC	1
1	108241450	CC	AC	1
1	108419099	AA	AG	1
1	108993903	TT	CT	1
1	109569111	GG	AG	1
1	109748336	GG	AG	1
1	109863168	GG	GT	1
1	110261153	CC	CT	1
1	110388087	GG	AG	1
1	110670438	CC	CG	1
1	110769606	AA	AG	1
1	110914192	CC	CT	1
1	110929681	CC	AC	1
1	111208791	AA	AT	1
1	111314672	CC	CG	1
1	111417619	CC	AC	1
1	111620632	TT	AT	1
1	111861032	AA	AT	1
1	111925512	TT	GT	1
1	111951478	TT	AT	1
1	112005468	GG	GT	1
1	112018869	TT	CT	1
1	112100232	GG	GT	1
1	112165261	TT	AT	1
1	112358930	CC	AC	1
1	112539329	AA	AG	1
1	112654483	GG	CG	1
1	112869422	CC	AC	1
1	113101466	CC	AC	1
1	113162010	TT	AT	1
1	113370284	GG	GT	1
1	113587679	CC	AC	1
1	113868752	AA	AT	1
1	114202620	TT	GT	1
1	114362162	AA	AT	1
1	114365143	GG	AG	1
1	114397187	GG	GT	1
1	114556329	CC	CT	1
1	114748032	CC	AC	1
1	115129858	TT	AT	1
1	115200956	GG	GT	1
1	115243302	GG	GT	1
1	115287082	AA	AT	1
1	115301360	CC	AC	1
1	115468476	GG	AG	1
1	115528293	TT	AT	1
1	115572883	GG	GT	1
1	116329123	TT	AT	1
1	116417544	AA	AG	1
1	116772083	GG	CG	1
1	117111527	GG	GT	1
1	117155526	AA	AC	1
1	117162614	CC	AC	1
1	117265944	AA	AT	1
1	117783307	GG	CG	1
1	117911714	CC	AC	1
1	118053963	GG	CG	1
1	118382660	CC	AC	1
1	118521618	TT	GT	1
1	118762345	AA	AG	1
1	118783789	TT	CT	1
1	119155897	CC	AC	1
1	144240390	GG	GT	1
1	144437664	CC	CT	1
1	144437982	AA	AG	1
1	145059380	CC	AC	1
1	145110582	CC	AC	1
1	145296614	AA	AG	1
1	145309053	AA	AG	1
1	145446050	CC	CT	1
1	148329694	CC	AC	1
1	148932190	GG	GT	1
1	149151481	CC	AC	1
1	149230136	TT	GT	1
1	149319746	AA	AG	1
1	149565350	TT	CT	1
1	149799627	GG	GT	1
1	150183582	AA	AC	1
1	150189679	GG	GT	1
1	150765424	AA	AG	1
1	150958888	GG	GT	1
1	150971981	AA	AC	1
1	150972097	AA	AG	1
1	151151321	CC	AC	1
1	151195136	GG	AG	1
1	151495547	TT	CT	1
1	151683348	GG	AG	1
1	151793407	CC	AC	1
1	151918824	CC	AC	1
1	152131039	GG	CG	1
1	152249453	GG	GT	1
1	152853258	AA	AT	1
1	153011330	CC	AC	1
1	153038018	TT	AT	1
1	153224206	CC	CG	1
1	153937378	GG	AG	1
1	154179907	CC	CT	1
1	155094098	GG	AG	1
1	155104065	TT	CT	1
1	155348496	CC	CT	1
1	155408731	AA	AT	1
1	155435883	CC	CG	1
1	155506475	GG	CG	1
1	155649149	CC	CT	1
1	155803981	CC	AC	1
1	155841164	CC	CT	1
1	155893073	GG	AG	1
1	155897611	TT	CT	1
1	155966855	AA	AG	1
1	156060228	CC	AC	1
1	156213220	AA	AG	1
1	156269091	GG	AG	1
1	156826051	AA	AT	1
1	156831788	AA	AG	1
1	156863125	GG	AG	1
1	156964237	AA	AG	1
1	157090754	AA	AT	1
1	157097020	CC	AC	1
1	157121592	CC	AC	1
1	157125852	AA	AG	1
1	157156669	CC	AC	1
1	157227482	AA	AG	1
1	157236299	TT	AT	1
1	157423423	CC	CT	1
1	157461063	GG	CG	1
1	157527387	GG	AG	1
1	157554572	GG	AG	1
1	157649991	GG	AG	1
1	157715692	TT	AT	1
1	157742845	GG	AG	1
1	157811089	CC	AC	1
1	157934647	GG	GT	1
1	157953703	TT	CT	1
1	158085031	TT	CT	1
1	158311951	GG	GT	1
1	158752123	AA	AG	1
1	158767002	CC	AC	1
1	158850343	GG	GT	1
1	159971189	CC	CT	1
1	160170644	GG	GT	1
1	160173248	CC	CT	1
1	160470100	CC	AC	1
1	160548127	CC	CT	1
1	160729176	CC	CT	1
1	160799555	CC	CT	1
1	161076335	GG	AG	1
1	161082661	GG	GT	1
1	161240724	GG	GT	1
1	161241959	TT	AT	1
1	161270273	TT	CT	1
1	161289823	GG	AG	1
1	161294402	GG	GT	1
1	161335990	CC	AC	1
1	161544923	TT	AT	1
1	161646009	GG	CG	1
1	161654905	TT	AT	1
1	161719694	CC	AC	1
1	161785230	CC	AC	1
1	161819093	GG	GT	1
1	161919155	CC	AC	1
1	161928432	GG	AG	1
1	162063456	CC	AC	1
1	162127478	TT	AT	1
1	162224630	CC	CT	1
1	162285385	AA	AT	1
1	162297368	CC	CG	1
1	162328914	CC	AC	1
1	162712191	CC	AC	1
1	162714881	CC	CT	1
1	162745877	CC	AC	1
1	163152957	TT	CT	1
1	163271158	GG	GT	1
1	163633440	TT	GT	1
1	163633783	TT	GT	1
1	163715390	CC	CG	1
1	163837982	CC	AC	1
1	164075569	CC	CT	1
1	164165905	GG	GT	1
1	164380646	CC	AC	1
1	164413296	GG	GT	1
1	164506012	AA	AG	1
1	164609766	CC	CT	1
1	164637696	CC	CG	1
1	164667515	CC	AC	1
1	164722905	TT	AT	1
1	164880295	GG	AG	1
1	164920470	CC	AC	1
1	165332375	CC	AC	1
1	165416540	CC	AC	1
1	165653052	CC	CT	1
1	165908639	GG	CG	1
1	166126858	CC	CG	1
1	166384831	CC	CT	1
1	166514896	GG	AG	1
1	166662008	GG	CG	1
1	166936642	CC	AC	1
1	167075423	TT	AT	1
1	167431640	CC	AC	1
1	167682321	GG	GT	1
1	167912757	CC	CG	1
1	168026011	CC	CT	1
1	168240025	TT	CT	1
1	168336586	TT	GT	1
1	168390339	CC	AC	1
1	168449696	CC	AC	1
1	168616136	CC	CT	1
1	169046062	CC	CT	1
1	169098827	CC	AC	1
1	169128559	CC	CT	1
1	169289230	TT	GT	1
1	169291097	GG	GT	1
1	169306540	AA	AC	1
1	169311494	CC	AC	1
1	169320151	AA	AG	1
1	169710521	GG	GT	1
1	170088264	GG	GT	1
1	170104372	AA	AG	1
1	170161536	CC	CG	1
1	170189489	AA	AG	1
1	170237128	GG	GT	1
1	170786917	GG	AG	1
1	171090929	CC	CG	1
1	171167991	GG	AG	1
1	171713542	GG	CG	1
1	171762938	GG	CG	1
1	172260462	GG	AG	1
1	172312239	AA	AG	1
1	172510426	TT	CT	1
1	172883087	AA	AG	1
1	173201955	TT	AT	1
1	173332597	CC	CT	1
1	173369072	GG	GT	1
1	173470625	GG	GT	1
1	173519174	AA	AT	1
1	173699019	GG	GT	1
1	173760960	GG	GT	1
1	173797469	CC	CG	1
1	173870467	GG	GT	1
1	173890332	CC	CT	1
1	173955610	CC	AC	1
1	173984866	TT	AT	1
1	174014519	CC	AC	1
1	174398108	CC	AC	1
1	174528292	GG	GT	1
1	174584637	TT	CT	1
1	174670006	GG	GT	1
1	174712952	CC	CT	1
1	174714492	GG	GT	1
1	174734696	CC	AC	1
1	174784066	CC	AC	1
1	174835716	GG	GT	1
1	174926040	CC	AC	1
1	174951857	GG	GT	1
1	175000348	GG	GT	1
1	175066517	GG	GT	1
1	175101218	GG	GT	1
1	175314068	CC	CG	1
1	175324583	GG	AG	1
1	175448657	AA	AT	1
1	175490155	AA	AT	1
1	175501685	CC	AC	1
1	175597989	TT	CT	1
1	175664844	CC	AC	1
1	175800168	AA	AT	1
1	175816001	GG	GT	1
1	175868897	CC	CT	1
1	175927006	AA	AG	1
1	175929492	GG	GT	1
1	176095720	GG	GT	1
1	176118524	CC	AC	1
1	176236253	CC	CG	1
1	176727903	CC	AC	1
1	176755836	GG	AG	1
1	176915755	GG	GT	1
1	177025700	CC	AC	1
1	177384383	GG	AG	1
1	177471448	GG	GT	1
1	177553880	GG	CG	1
1	177661905	AA	AG	1
1	177667807	TT	CT	1
1	177748126	GG	GT	1
1	177919507	GG	GT	1
1	177925260	GG	GT	1
1	177956955	GG	GT	1
1	178101223	CC	AC	1
1	178218745	CC	CT	1
1	178300161	GG	CG	1
1	178819425	GG	GT	1
1	178822396	TT	CT	1
1	178881641	GG	GT	1
1	178964688	TT	CT	1
1	179112940	GG	AG	1
1	179541344	GG	GT	1
1	179746012	TT	GT	1
1	179983191	AA	AC	1
1	180116110	TT	AT	1
1	180129046	GG	AG	1
1	180225386	GG	AG	1
1	180226848	GG	GT	1
1	180709754	GG	GT	1
1	180841351	AA	AT	1
1	180896474	CC	AC	1
1	180937190	GG	GT	1
1	180978497	GG	GT	1
1	181239145	CC	CT	1
1	181560004	TT	CT	1
1	181573787	CC	AC	1
1	182101233	TT	CT	1
1	182144738	CC	CG	1
1	182152200	CC	AC	1
1	183048281	AA	AC	1
1	183357674	CC	AC	1
1	183480015	GG	GT	1
1	183859417	CC	CT	1
1	184077880	AA	AG	1
1	184123755	CC	CG	1
1	184142585	CC	AC	1
1	184195022	GG	AG	1
1	184686247	GG	GT	1
1	184837725	GG	GT	1
1	184872955	AA	AT	1
1	184908666	AA	AG	1
1	185064093	GG	GT	1
1	185245878	GG	CG	1
1	185369710	CC	AC	1
1	185406577	GG	GT	1
1	185457138	TT	GT	1
1	185469153	TT	AT	1
1	185508902	GG	AG	1
1	185519118	GG	AG	1
1	185608326	CC	CT	1
1	185625709	GG	AG	1
1	185656640	GG	GT	1
1	185681350	CC	CT	1
1	185751745	GG	GT	1
1	185787479	TT	GT	1
1	185915321	TT	CT	1
1	186018729	CC	AC	1
1	186094583	GG	AG	1
1	186229163	CC	AC	1
1	186337924	GG	GT	1
1	186432782	CC	CT	1
1	186495026	GG	GT	1
1	186618121	TT	CT	1
1	186694178	AA	AT	1
1	186704151	GG	AG	1
1	186729767	TT	CT	1
1	186813701	GG	GT	1
1	186875536	TT	AT	1
1	186943074	AA	AG	1
1	186963571	GG	GT	1
1	186974188	GG	GT	1
1	187028838	GG	CG	1
1	187149415	GG	GT	1
1	187156257	CC	CG	1
1	187234781	AA	AC	1
1	187287499	GG	GT	1
1	187333303	CC	CT	1
1	187363313	GG	CG	1
1	187363872	GG	GT	1
1	187442195	GG	AG	1
1	187465327	TT	AT	1
1	187574799	CC	AC	1
1	187718244	CC	AC	1
1	187746688	GG	CG	1
1	187803967	GG	GT	1
1	187806019	GG	AG	1
1	187815695	GG	GT	1
1	187872401	GG	AG	1
1	187875982	GG	GT	1
1	187908240	AA	AT	1
1	187950225	AA	AG	1
1	187960410	GG	GT	1
1	187967046	GG	AG	1
1	188034380	AA	AT	1
1	188039643	CC	AC	1
1	188047720	CC	CG	1
1	188109197	TT	AT	1
1	188112569	TT	AT	1
1	188146398	AA	AT	1
1	188181567	CC	CT	1
1	188227077	GG	GT	1
1	188295794	CC	AC	1
1	188328608	GG	GT	1
1	188337527	GG	CG	1
1	188338673	GG	GT	1
1	188343936	CC	CG	1
1	188382466	TT	CT	1
1	188466209	GG	CG	1
1	188475881	AA	AG	1
1	188604568	GG	AG	1
1	188740420	CC	AC	1
1	188750350	AA	AT	1
1	188911998	CC	AC	1
1	188970690	CC	AC	1
1	188986556	CC	CT	1
1	189004227	CC	CT	1
1	189014711	AA	AG	1
1	189015880	CC	AC	1
1	189064074	GG	GT	1
1	189077288	CC	CT	1
1	189098543	AA	AG	1
1	189116007	GG	CG	1
1	189222393	TT	CT	1
1	189232012	CC	AC	1
1	189247425	TT	AT	1
1	189251936	GG	GT	1
1	189266814	AA	AC	1
1	189283792	CC	CT	1
1	189324389	CC	AC	1
1	189335849	CC	AC	1
1	189374496	GG	GT	1
1	189442524	CC	AC	1
1	189458430	TT	AT	1
1	189458434	TT	GT	1
1	189544658	TT	CT	1
1	189582832	GG	AG	1
1	189715365	GG	GT	1
1	189817410	GG	AG	1
1	189859636	CC	AC	1
1	189926447	GG	GT	1
1	190007095	GG	AG	1
1	190140397	CC	AC	1
1	190183673	GG	AG	1
1	190228635	AA	AG	1
1	190232475	GG	GT	1
1	190266111	GG	GT	1
1	190280210	CC	CT	1
1	190290208	GG	GT	1
1	190293136	GG	AG	1
1	190297900	GG	CG	1
1	190346015	GG	GT	1
1	190356683	GG	GT	1
1	190356729	TT	AT	1
1	190360947	AA	AG	1
1	190469978	GG	AG	1
1	190540228	TT	GT	1
1	190576295	GG	GT	1
1	190684620	GG	AG	1
1	190743574	CC	AC	1
1	190953527	CC	AC	1
1	190957363	AA	AT	1
1	191053744	TT	CT	1
1	191155881	CC	CG	1
1	191192180	TT	CT	1
1	191204715	AA	AT	1
1	191301168	AA	AG	1
1	191358417	AA	AG	1
1	191731244	TT	AT	1
1	191893178	AA	AT	1
1	191963109	GG	AG	1
1	191966383	AA	AG	1
1	192044918	AA	AT	1
1	192114778	GG	GT	1
1	192235791	CC	AC	1
1	192255875	AA	AT	1
1	192403889	AA	AC	1
1	192434825	GG	GT	1
1	192552016	GG	GT	1
1	192627868	CC	CG	1
1	192648467	TT	CT	1
1	192678708	TT	CT	1
1	192697171	AA	AG	1
1	192706997	GG	GT	1
1	192747804	GG	AG	1
1	192827805	TT	AT	1
1	192836343	AA	AG	1
1	192877463	GG	CG	1
1	192931686	GG	CG	1
1	192975425	GG	AG	1
1	193041821	GG	CG	1
1	193079418	AA	AC	1
1	193079549	GG	GT	1
1	193129564	GG	GT	1
1	193160166	CC	CT	1
1	193206053	CC	CG	1
1	193206106	AA	AT	1
1	193304158	TT	CT	1
1	193347537	TT	AT	1
1	193407799	CC	AC	1
1	193474252	CC	CT	1
1	193539034	GG	CG	1
1	193550371	AA	AT	1
1	193556615	GG	GT	1
1	193816199	GG	AG	1
1	193817343	AA	AG	1
1	193938343	GG	GT	1
1	194022745	TT	AT	1
1	194078451	CC	CG	1
1	194100365	AA	AT	1
1	194159814	TT	CT	1
1	194205207	AA	AT	1
1	194221511	GG	GT	1
1	194230808	TT	AT	1
1	194326896	CC	AC	1
1	194345356	GG	AG	1
1	194514628	TT	CT	1
1	194688635	CC	CG	1
1	194724759	CC	AC	1
1	194905781	TT	AT	1
1	194917439	CC	CT	1
1	195200695	TT	CT	1
1	195376246	TT	GT	1
1	195444763	AA	AT	1
1	195644225	CC	CT	1
1	195645230	AA	AT	1
1	195655843	GG	GT	1
1	195659916	AA	AT	1
1	195683166	GG	GT	1
1	195709384	CC	AC	1
1	195747397	CC	CG	1
1	195756673	AA	AC	1
1	196105913	CC	AC	1
1	196136140	TT	CT	1
1	196158580	CC	CT	1
1	196351099	CC	AC	1
1	196580455	GG	GT	1
1	196788091	GG	CG	1
1	197143569	AA	AG	1
1	197263703	CC	AC	1
1	197327292	CC	CT	1
1	197427108	CC	CG	1
1	197819459	CC	AC	1
1	197940098	AA	AT	1
1	197979621	GG	GT	1
1	198081261	CC	AC	1
1	198111420	AA	AG	1
1	198122761	GG	AG	1
1	198195698	CC	CT	1
1	198333385	GG	AG	1
1	198451388	AA	AG	1
1	198453678	GG	CG	1
1	198485887	CC	AC	1
1	198519864	CC	AC	1
1	198705922	CC	AC	1
1	199316223	GG	AG	1
1	199797466	TT	CT	1
1	199817439	GG	GT	1
1	199933846	GG	AG	1
1	200131480	TT	AT	1
1	200167515	CC	CT	1
1	200588015	AA	AG	1
1	200805510	AA	AG	1
1	201108664	AA	AT	1
1	201225953	TT	CT	1
1	201313656	GG	GT	1
1	201489957	TT	CT	1
1	201537217	GG	GT	1
1	201658961	GG	GT	1
1	202065909	GG	AG	1
1	202265897	TT	CT	1
1	202346471	AA	AG	1
1	202479286	GG	GT	1
1	202672862	GG	AG	1
1	202771057	CC	CG	1
1	203004662	CC	AC	1
1	203295967	TT	CT	1
1	203950242	TT	CT	1
1	203968798	TT	CT	1
1	205040316	GG	AG	1
1	205309560	GG	GT	1
1	205384205	CC	AC	1
1	206070805	TT	CT	1
1	206318931	GG	AG	1
1	206549059	CC	CT	1
1	206627717	CC	CG	1
1	206796725	CC	CT	1
1	206840237	AA	AG	1
1	206929934	CC	AC	1
1	207128100	CC	CT	1
1	207275587	TT	CT	1
1	207396264	AA	AG	1
1	207524721	AA	AT	1
1	207818498	TT	CT	1
1	208171492	CC	CT	1
1	208497809	CC	CT	1
1	208795033	TT	CT	1
1	208840150	AA	AG	1
1	208871935	GG	AG	1
1	208910842	GG	GT	1
1	209019002	TT	CT	1
1	209266996	CC	AC	1
1	209451354	GG	AG	1
1	210088641	GG	GT	1
1	210503684	GG	AG	1
1	210902019	AA	AT	1
1	211278814	GG	CG	1
1	211301884	TT	AT	1
1	211747509	CC	AC	1
1	211880085	GG	AG	1
1	211910459	TT	CT	1
1	211931785	GG	GT	1
1	211943067	GG	AG	1
1	212099685	GG	GT	1
1	212156691	AA	AT	1
1	212231341	AA	AG	1
1	212325481	GG	CG	1
1	212350860	TT	AT	1
1	212352226	TT	CT	1
1	212353962	CC	AC	1
1	212561559	GG	GT	1
1	212967514	GG	GT	1
1	212988204	CC	CG	1
1	213116673	CC	AC	1
1	213155952	AA	AG	1
1	213330886	AA	AT	1
1	213551269	CC	CG	1
1	213937775	CC	AC	1
1	213964744	GG	GT	1
1	214188675	GG	GT	1
1	214248707	CC	AC	1
1	214252033	GG	CG	1
1	214327205	CC	AC	1
1	214341638	AA	AG	1
1	214370728	CC	AC	1
1	214387159	GG	GT	1
1	214392878	GG	GT	1
1	214432468	CC	AC	1
1	214542447	CC	CG	1
1	214550445	CC	AC	1
1	214550590	AA	AT	1
1	214648128	CC	AC	1
1	214700390	TT	CT	1
1	214796842	CC	CT	1
1	214853067	GG	AG	1
1	214863149	GG	GT	1
1	214913158	AA	AC	1
1	214954603	TT	AT	1
1	214970752	CC	CG	1
1	215073517	GG	GT	1
1	215199779	TT	GT	1
1	215199790	CC	AC	1
1	215282891	AA	AG	1
1	215505570	AA	AG	1
1	215573865	CC	AC	1
1	215580810	AA	AT	1
1	215613495	CC	CT	1
1	215890235	CC	CT	1
1	215974501	GG	GT	1
1	216013051	GG	GT	1
1	216181504	CC	CG	1
1	216284429	CC	CT	1
1	216312371	AA	AG	1
1	216429493	AA	AG	1
1	216564242	GG	AG	1
1	216962114	AA	AT	1
1	217346030	AA	AC	1
1	217542046	AA	AG	1
1	217543518	GG	AG	1
1	217786128	GG	AG	1
1	218100549	GG	AG	1
1	218715513	GG	CG	1
1	218759236	TT	AT	1
1	218944266	AA	AT	1
1	219175700	GG	GT	1
1	219230349	CC	CG	1
1	219295515	CC	AC	1
1	219423673	AA	AG	1
1	219458867	GG	GT	1
1	219473577	CC	CT	1
1	219500702	TT	AT	1
1	219562388	GG	GT	1
1	219608099	GG	AG	1
1	219613821	CC	AC	1
1	219816594	AA	AG	1
1	219868058	GG	AG	1
1	220170007	CC	AC	1
1	220214217	AA	AG	1
1	220403089	CC	AC	1
1	220479028	CC	CT	1
1	220516476	TT	CT	1
1	220538333	GG	GT	1
1	220652331	CC	AC	1
1	220688424	CC	CT	1
1	220771173	CC	AC	1
1	221177506	CC	CG	1
1	221303576	GG	GT	1
1	221508213	GG	GT	1
1	221540520	AA	AC	1
1	221701052	CC	AC	1
1	221718235	TT	CT	1
1	222650349	CC	CG	1
1	222864154	GG	CG	1
1	223050569	GG	AG	1
1	223053135	AA	AG	1
1	223132254	AA	AC	1
1	223239669	CC	CG	1
1	223368678	AA	AG	1
1	223783731	CC	CT	1
1	223923317	TT	AT	1
1	224042692	AA	AT	1
1	224045860	CC	CT	1
1	224586151	CC	CT	1
1	225126222	GG	AG	1
1	225696023	CC	CG	1
1	226123579	AA	AT	1
1	226436707	A	AG	1
1	226441211	C	CT	1
1	226451278	C	CT	1
1	226470318	C	AC	1
1	226515657	C	CG	1
1	226661194	T	GT	1
1	226681092	C	CT	1
1	226854558	G	GT	1
1	226951520	GG	AG	1
1	226958112	GG	GT	1
1	227067604	GG	CG	1
1	227078937	AA	AT	1
1	228076022	TT	CT	1
1	228146148	TT	AT	1
1	228715972	GG	CG	1
1	229013569	GG	AG	1
1	229055712	CC	AC	1
1	229293246	GG	GT	1
1	229313406	CC	CT	1
1	229677168	GG	GT	1
1	230187481	GG	AG	1
1	230195085	AA	AT	1
1	230215535	GG	CG	1
1	230556271	GG	AG	1
1	230729657	TT	AT	1
1	230784442	TT	AT	1
1	230857934	GG	CG	1
1	231117249	TT	AT	1
1	231236013	TT	AT	1
1	231413884	TT	AT	1
1	231571089	GG	AG	1
1	232042508	TT	CT	1
1	232244771	CC	AC	1
1	232377926	GG	AG	1
1	233087321	TT	CT	1
1	233126166	CC	CG	1
1	233607162	GG	GT	1
1	233813577	AA	AG	1
1	233947237	GG	CG	1
1	234079486	GG	GT	1
1	234141071	AA	AG	1
1	234417241	AA	AG	1
1	234596141	CC	CG	1
1	234685298	AA	AG	1
1	234690317	CC	CT	1
1	234853263	CC	CT	1
1	234865335	GG	AG	1
1	235012859	TT	AT	1
1	235194070	CC	CT	1
1	235239063	CC	CG	1
1	235302662	GG	GT	1
1	235359923	GG	GT	1
1	235482407	GG	CG	1
1	235624881	AA	AT	1
1	235626736	CC	CT	1
1	235648000	CC	CT	1
1	235665578	CC	AC	1
1	235701707	TT	AT	1
1	235795509	CC	AC	1
1	235801395	GG	GT	1
1	235841285	GG	CG	1
1	235873993	CC	CT	1
1	235922731	GG	GT	1
1	235940358	GG	GT	1
1	235961008	AA	AG	1
1	235965000	CC	CG	1
1	235974336	TT	CT	1
1	236119738	CC	AC	1
1	236119961	CC	AC	1
1	236265171	CC	CT	1
1	236389178	GG	GT	1
1	236422797	GG	GT	1
1	236637253	AA	AC	1
1	236932522	GG	GT	1
1	236951482	CC	AC	1
1	237022280	CC	AC	1
1	237074008	GG	AG	1
1	237245989	GG	GT	1
1	237250761	GG	CG	1
1	237265305	CC	AC	1
1	237270517	GG	GT	1
1	237297975	CC	CT	1
1	237304806	CC	CG	1
1	237349764	GG	AG	1
1	237356540	CC	AC	1
1	237358301	GG	GT	1
1	237386573	CC	AC	1
1	237425600	CC	AC	1
1	237426653	GG	AG	1
1	237452082	GG	AG	1
1	237456622	GG	AG	1
1	237471475	TT	AT	1
1	237480320	TT	AT	1
1	237513175	CC	CT	1
1	237537661	CC	CG	1
1	237567098	GG	GT	1
1	237607166	TT	AT	1
1	237672981	GG	GT	1
1	237738837	GG	GT	1
1	237753573	TT	GT	1
1	237809715	TT	CT	1
1	237864986	TT	CT	1
1	237914109	GG	GT	1
1	237918992	GG	GT	1
1	237968220	AA	AG	1
1	238099728	CC	CT	1
1	238254542	AA	AG	1
1	238271265	G	GT	1
1	238353432	A	AC	1
1	238362393	G	AG	1
1	238382373	G	AG	1
1	238394142	C	CG	1
1	238466879	G	GT	1
1	238499196	T	CT	1
1	238501933	G	AG	1
1	238593376	GG	GT	1
1	238764344	GG	GT	1
1	238800840	CC	AC	1
1	238867451	CC	CG	1
1	238905784	GG	AG	1
1	238905809	CC	CT	1
1	238923522	CC	AC	1
1	238927142	TT	CT	1
1	239248304	CC	CT	1
1	239286395	CC	AC	1
1	239286859	CC	CT	1
1	239302521	CC	CG	1
1	239446102	GG	GT	1
1	239461042	GG	GT	1
1	239488435	CC	AC	1
1	239504199	AA	AG	1
1	239543812	GG	AG	1
1	239581604	TT	CT	1
1	239625023	CC	AC	1
1	239668513	GG	AG	1
1	239835028	TT	CT	1
1	239907934	AA	AG	1
1	239949114	AA	AC	1
1	240126642	GG	GT	1
1	240159635	GG	AG	1
1	240241726	CC	CG	1
1	240279691	AA	AG	1
1	240379843	AA	AG	1
1	240641200	GG	GT	1
1	240749602	CC	AC	1
1	240810307	TT	AT	1
1	240815369	AA	AG	1
1	240907091	AA	AT	1
1	241017311	TT	GT	1
1	241660262	TT	GT	1
1	241719574	GG	GT	1
1	241827419	CC	AC	1
1	241844198	CC	AC	1
1	242061778	TT	CT	1
1	242241141	CC	AC	1
1	242518885	CC	AC	1
1	243137567	CC	CT	1
1	243704137	CC	CG	1
1	243909460	CC	AC	1
1	244335309	CC	CG	1
1	244759888	TT	CT	1
1	244808289	GG	GT	1
1	244818503	GG	GT	1
1	245140200	TT	AT	1
1	245213471	CC	AC	1
1	245238751	GG	CG	1
1	245264578	TT	CT	1
1	245320981	TT	CT	1
1	245444724	CC	AC	1
1	245550496	CC	AC	1
1	245661566	CC	AC	1
1	245696394	GG	GT	1
1	245777651	CC	AC	1
1	245812388	GG	AG	1
1	245826613	CC	CG	1
1	245877313	CC	AC	1
1	245900099	GG	GT	1
1	246058303	GG	GT	1
1	246105884	CC	CT	1
1	246120563	AA	AG	1
1	246262602	CC	CG	1
1	246357732	GG	GT	1
1	246380032	GG	GT	1
1	246610651	AA	AG	1
1	246610952	CC	AC	1
1	246619342	CC	CT	1
1	246856769	CC	AC	1
1	247170790	GG	GT	1
2	25862	CC	AC	1
2	86227	CC	AC	1
2	239037	TT	CT	1
2	245649	TT	GT	1
2	323718	CC	AC	1
2	394248	GG	AG	1
2	615661	CC	AC	1
2	700426	GG	GT	1
2	830184	CC	AC	1
2	910444	GG	CG	1
2	1005714	GG	GT	1
2	1208864	TT	CT	1
2	1337015	GG	AG	1
2	1514745	CC	CG	1
2	1548598	GG	AG	1
2	1578742	CC	CT	1
2	1601078	CC	CT	1
2	1942076	TT	GT	1
2	2063236	CC	CT	1
2	2121664	CC	AC	1
2	2177064	GG	CG	1
2	2225155	GG	AG	1
2	2230855	AA	AG	1
2	2253531	TT	AT	1
2	2599557	GG	CG	1
2	2618102	CC	AC	1
2	2778295	GG	AG	1
2	2899656	GG	AG	1
2	2969570	GG	CG	1
2	3111970	CC	CT	1
2	3192524	TT	AT	1
2	3471814	TT	GT	1
2	3744526	AA	AT	1
2	3812425	GG	GT	1
2	3854957	CC	AC	1
2	4081387	GG	CG	1
2	4113744	TT	CT	1
2	4245523	CC	CG	1
2	4258094	TT	CT	1
2	4454102	TT	CT	1
2	4604482	CC	AC	1
2	4612880	TT	AT	1
2	4667353	CC	CG	1
2	4769624	AA	AT	1
2	4783346	TT	AT	1
2	4833777	AA	AG	1
2	4843507	TT	CT	1
2	4855764	CC	CG	1
2	4940068	GG	GT	1
2	5210899	TT	AT	1
2	5237744	GG	AG	1
2	5347352	GG	GT	1
2	5453681	CC	AC	1
2	5459888	CC	CT	1
2	5465790	CC	CT	1
2	5492263	GG	AG	1
2	5571148	CC	AC	1
2	5590916	CC	AC	1
2	5721323	CC	CT	1
2	5774851	GG	AG	1
2	5826700	TT	AT	1
2	5835577	GG	GT	1
2	5892502	GG	AG	1
2	5968459	CC	AC	1
2	6160250	CC	AC	1
2	6211094	AA	AC	1
2	6223099	GG	CG	1
2	6237909	CC	AC	1
2	6291386	AA	AG	1
2	6294655	CC	AC	1
2	6309202	CC	AC	1
2	6374661	CC	AC	1
2	6507227	CC	AC	1
2	6534479	GG	AG	1
2	6572851	CC	CT	1
2	6578332	CC	CG	1
2	6705006	GG	GT	1
2	6724313	GG	GT	1
2	6834851	GG	GT	1
2	6882035	TT	GT	1
2	7057181	GG	GT	1
2	7195948	CC	AC	1
2	7310490	AA	AG	1
2	7312083	CC	AC	1
2	7695942	TT	CT	1
2	7792808	TT	CT	1
2	7889526	AA	AT	1
2	7947040	AA	AG	1
2	8154391	TT	CT	1
2	8158981	AA	AG	1
2	8236842	CC	AC	1
2	8345118	CC	CT	1
2	8405011	CC	AC	1
2	8438109	TT	CT	1
2	8495658	CC	AC	1
2	8554340	CC	AC	1
2	9148066	TT	CT	1
2	9182227	GG	GT	1
2	10058835	AA	AG	1
2	10072978	GG	AG	1
2	10129173	CC	AC	1
2	10170455	GG	GT	1
2	10355919	GG	GT	1
2	10641690	TT	CT	1
2	11140872	AA	AG	1
2	12056699	AA	AG	1
2	12320354	GG	GT	1
2	12330189	CC	AC	1
2	12408564	GG	GT	1
2	12414603	TT	AT	1
2	12540739	TT	CT	1
2	12804741	TT	CT	1
2	12961308	CC	CT	1
2	13090588	TT	AT	1
2	13259563	CC	CT	1
2	13287906	TT	AT	1
2	13290755	AA	AT	1
2	13341273	CC	AC	1
2	13372876	GG	GT	1
2	13494222	GG	GT	1
2	13679719	CC	AC	1
2	13748110	CC	AC	1
2	13778843	AA	AG	1
2	13849412	GG	CG	1
2	13872940	GG	GT	1
2	13906628	CC	CT	1
2	14041287	CC	AC	1
2	14060262	CC	AC	1
2	14062949	AA	AG	1
2	14083270	CC	AC	1
2	14084914	CC	AC	1
2	14086502	TT	GT	1
2	14142477	CC	AC	1
2	14290835	AA	AT	1
2	14901540	CC	AC	1
2	15121096	CC	AC	1
2	15171829	CC	AC	1
2	15391157	AA	AG	1
2	15432795	TT	CT	1
2	15893696	CC	AC	1
2	15936417	CC	AC	1
2	16008822	GG	GT	1
2	16402443	GG	AG	1
2	16409569	AA	AG	1
2	16456320	CC	AC	1
2	16583734	GG	GT	1
2	16753922	GG	AG	1
2	16910057	AA	AT	1
2	17008499	GG	GT	1
2	17173936	AA	AG	1
2	17468428	AA	AC	1
2	17895440	TT	CT	1
2	18074845	CC	CT	1
2	18096245	AA	AG	1
2	18098114	CC	CT	1
2	18159364	AA	AG	1
2	18164470	CC	AC	1
2	18376229	TT	AT	1
2	18549568	GG	AG	1
2	18727199	AA	AG	1
2	19329321	GG	AG	1
2	19478461	GG	CG	1
2	19617228	AA	AT	1
2	19711007	GG	AG	1
2	19747241	CC	CT	1
2	19835526	TT	AT	1
2	20610004	AA	AG	1
2	20928502	TT	AT	1
2	20997999	CC	AC	1
2	21097542	CC	AC	1
2	21182596	GG	AG	1
2	21752866	GG	AG	1
2	21765487	GG	GT	1
2	21938766	CC	CT	1
2	22104195	GG	CG	1
2	22116461	TT	CT	1
2	22140243	TT	AT	1
2	22395696	GG	GT	1
2	22580251	CC	AC	1
2	22627779	GG	CG	1
2	22640785	CC	AC	1
2	22641098	GG	AG	1
2	22709433	GG	GT	1
2	22841714	GG	AG	1
2	23259354	GG	GT	1
2	23294822	GG	CG	1
2	23331402	TT	AT	1
2	23508299	GG	AG	1
2	23646734	AA	AG	1
2	23779739	AA	AC	1
2	23866625	GG	GT	1
2	24185291	GG	AG	1
2	24622712	CC	AC	1
2	24671661	AA	AG	1
2	25226494	GG	A	1
2	26190865	AA	AG	1
2	26737393	CC	CT	1
2	27126607	GG	CG	1
2	28636375	GG	AG	1
2	28683806	GG	GT	1
2	29224495	GG	GT	1
2	29346496	AA	AG	1
2	29382968	GG	CG	1
2	29451781	CC	AC	1
2	29501593	GG	AG	1
2	29649967	CC	CT	1
2	29686229	CC	AC	1
2	29965876	TT	CT	1
2	30039375	GG	AG	1
2	30122175	CC	AC	1
2	30214668	GG	GT	1
2	30415738	GG	CG	1
2	30903672	CC	AC	1
2	30974910	TT	CT	1
2	31148885	TT	CT	1
2	31234076	CC	AC	1
2	31667373	GG	GT	1
2	31727312	AA	AG	1
2	31744204	CC	AC	1
2	31769131	CC	AC	1
2	31786619	TT	CT	1
2	32243579	CC	AC	1
2	32662732	CC	CT	1
2	32671413	GG	GT	1
2	32740273	GG	AG	1
2	32760700	CC	CG	1
2	33349998	GG	GT	1
2	33593817	GG	AG	1
2	33711937	GG	GT	1
2	33846851	AA	AT	1
2	33879033	AA	AT	1
2	34084061	GG	GT	1
2	34154890	GG	AG	1
2	34155769	CC	CT	1
2	34173598	TT	AT	1
2	34325887	CC	AC	1
2	34357410	GG	GT	1
2	34452783	TT	AT	1
2	34501601	AA	AT	1
2	34531138	GG	GT	1
2	34596704	GG	AG	1
2	34605670	GG	GT	1
2	34628777	GG	GT	1
2	34631346	GG	GT	1
2	34640473	TT	GT	1
2	34750708	AA	AT	1
2	34833326	GG	AG	1
2	34971026	CC	AC	1
2	35032948	TT	CT	1
2	35143573	AA	AG	1
2	35168723	CC	CG	1
2	35233328	TT	GT	1
2	35291769	CC	AC	1
2	35343653	GG	CG	1
2	35390804	GG	GT	1
2	35460355	GG	GT	1
2	35527103	CC	AC	1
2	35679505	AA	AG	1
2	35883430	GG	GT	1
2	35947797	CC	AC	1
2	35987554	GG	AG	1
2	36002422	CC	AC	1
2	36121706	CC	CT	1
2	36245771	GG	GT	1
2	36265763	GG	GT	1
2	36405687	CC	AC	1
2	36507333	CC	AC	1
2	36524481	CC	AC	1
2	36763613	GG	GT	1
2	37266902	TT	CT	1
2	37585357	CC	AC	1
2	37663618	GG	GT	1
2	37672673	AA	AG	1
2	38252010	GG	AG	1
2	38618752	CC	CG	1
2	38699306	AA	AG	1
2	38772269	GG	AG	1
2	38863978	GG	AG	1
2	39434284	TT	CT	1
2	39710652	CC	CT	1
2	39740170	GG	AG	1
2	40238324	CC	AC	1
2	40283062	CC	CT	1
2	40318103	CC	AC	1
2	40382921	CC	CT	1
2	40490081	CC	AC	1
2	40691071	TT	CT	1
2	40814295	TT	CT	1
2	40820574	CC	AC	1
2	40870713	GG	GT	1
2	40899677	CC	AC	1
2	40965382	CC	AC	1
2	41117843	GG	AG	1
2	41218515	AA	AG	1
2	41250276	TT	GT	1
2	41250294	AA	AC	1
2	41290840	AA	AG	1
2	41322438	CC	CG	1
2	41365477	GG	AG	1
2	41366576	CC	AC	1
2	41442517	CC	CT	1
2	41444253	GG	AG	1
2	41478872	CC	AC	1
2	41574053	AA	AG	1
2	41574822	CC	AC	1
2	41694589	GG	GT	1
2	41807504	CC	CT	1
2	42978540	TT	AT	1
2	43023358	CC	CG	1
2	43033244	CC	CT	1
2	43378130	CC	CT	1
2	43386062	TT	CT	1
2	43665023	GG	GT	1
2	43791843	AA	AT	1
2	43959904	GG	GT	1
2	44120085	AA	AT	1
2	44235476	GG	AG	1
2	44344107	AA	AT	1
2	44561993	GG	GT	1
2	44701833	CC	CT	1
2	44771516	GG	AG	1
2	44811388	GG	AG	1
2	44842519	AA	AC	1
2	44861557	AA	AT	1
2	45150379	CC	AC	1
2	45391008	CC	CT	1
2	45661951	TT	CT	1
2	45689379	GG	GT	1
2	46095027	GG	GT	1
2	46586622	GG	GT	1
2	47257119	CC	CT	1
2	47271175	TT	CT	1
2	47830306	GG	AG	1
2	47906312	TT	CT	1
2	47977886	CC	AC	1
2	48035990	GG	AG	1
2	48051516	CC	AC	1
2	48151651	CC	AC	1
2	48154658	GG	GT	1
2	48154895	TT	CT	1
2	48287291	GG	GT	1
2	48320661	AA	AG	1
2	48418867	TT	GT	1
2	48730531	GG	GT	1
2	48853436	GG	GT	1
2	48899062	TT	CT	1
2	48948841	CC	AC	1
2	48987834	GG	GT	1
2	49058989	GG	GT	1
2	49107864	CC	AC	1
2	49113034	GG	AG	1
2	49132409	CC	CT	1
2	49182991	AA	AC	1
2	49204776	CC	AC	1
2	49220010	CC	AC	1
2	49265444	TT	GT	1
2	49422217	GG	GT	1
2	49497877	AA	AC	1
2	49666250	CC	AC	1
2	49673627	CC	AC	1
2	49914388	AA	AG	1
2	50108244	CC	AC	1
2	50187013	AA	AG	1
2	50291616	CC	AC	1
2	50389162	TT	GT	1
2	50404422	CC	CG	1
2	50431754	CC	CT	1
2	50563597	GG	AG	1
2	50589335	GG	AG	1
2	50690667	GG	GT	1
2	50720667	CC	AC	1
2	50721229	CC	AC	1
2	50878574	TT	CT	1
2	50921994	CC	CG	1
2	50974339	CC	AC	1
2	51294900	GG	GT	1
2	51486206	AA	AC	1
2	51571815	AA	AC	1
2	51576718	CC	AC	1
2	51593470	TT	GT	1
2	51764011	GG	GT	1
2	51801638	AA	AT	1
2	51823796	AA	AG	1
2	51832552	CC	AC	1
2	52084214	GG	GT	1
2	52104080	CC	AC	1
2	52153889	TT	CT	1
2	52389074	AA	AT	1
2	52452444	GG	GT	1
2	52704394	GG	AG	1
2	52738977	GG	GT	1
2	52848853	CC	CG	1
2	52997186	GG	AG	1
2	53016654	CC	CT	1
2	53073967	AA	AG	1
2	53098566	CC	AC	1
2	53161615	AA	AG	1
2	53182939	CC	CT	1
2	53220370	TT	CT	1
2	53304226	TT	CT	1
2	53372598	GG	AG	1
2	53572746	GG	AG	1
2	54017135	TT	CT	1
2	54359490	AA	AG	1
2	54432107	CC	CT	1
2	54438214	CC	AC	1
2	54603277	GG	AG	1
2	55074534	AA	AT	1
2	55122020	GG	GT	1
2	55230870	GG	AG	1
2	55512389	GG	AG	1
2	55566919	TT	CT	1
2	55593096	TT	AT	1
2	55614176	CC	AC	1
2	55811103	GG	CG	1
2	56226532	GG	AG	1
2	56535058	AA	AT	1
2	56583444	CC	AC	1
2	56685609	TT	CT	1
2	56689920	TT	CT	1
2	56815583	GG	CG	1
2	56847288	GG	GT	1
2	56991270	CC	CT	1
2	57010780	GG	AG	1
2	57035932	TT	AT	1
2	57076510	AA	AT	1
2	57114276	AA	AG	1
2	57115121	TT	CT	1
2	57401907	TT	CT	1
2	57432827	GG	AG	1
2	57511071	TT	AT	1
2	57636397	CC	AC	1
2	57672169	AA	AT	1
2	57869644	AA	AT	1
2	57912997	TT	CT	1
2	58030582	CC	CG	1
2	58065219	GG	AG	1
2	58115958	CC	AC	1
2	58171650	AA	AG	1
2	58448275	AA	AC	1
2	58644074	AA	AT	1
2	59079926	CC	CT	1
2	59146258	GG	CG	1
2	59510348	CC	CT	1
2	59718308	GG	AG	1
2	59754146	CC	AC	1
2	59875180	GG	AG	1
2	60589804	CC	AC	1
2	60694159	TT	CT	1
2	60938244	GG	AG	1
2	61192064	CC	CT	1
2	61459080	GG	AG	1
2	61668152	CC	AC	1
2	63118043	TT	CT	1
2	63174820	CC	AC	1
2	63941359	AA	AT	1
2	64165260	GG	CG	1
2	65303653	TT	CT	1
2	65303654	CC	CT	1
2	65989916	AA	AG	1
2	66296476	TT	CT	1
2	66750769	TT	AT	1
2	66882841	CC	AC	1
2	67020378	TT	CT	1
2	67124672	GG	CG	1
2	67909804	CC	CT	1
2	67956192	GG	GT	1
2	68020437	AA	AG	1
2	68164349	GG	GT	1
2	68190027	AA	AT	1
2	69080832	GG	GT	1
2	69380428	CC	AC	1
2	69416991	AA	AG	1
2	69587806	CC	CG	1
2	70287429	TT	CT	1
2	70746247	CC	CT	1
2	70797051	CC	CT	1
2	70914545	AA	AG	1
2	70989052	CC	CG	1
2	71698945	TT	AT	1
2	71741055	GG	CG	1
2	71868546	CC	AC	1
2	71892490	CC	AC	1
2	71944178	CC	AC	1
2	72023660	GG	GT	1
2	72024383	GG	AG	1
2	72045708	GG	GT	1
2	72204730	AA	AC	1
2	72368879	CC	CG	1
2	72442504	GG	AG	1
2	72869313	TT	CT	1
2	73011299	TT	CT	1
2	73049936	GG	GT	1
2	73197917	GG	GT	1
2	73439331	TT	CT	1
2	73534707	GG	AG	1
2	73944999	TT	AT	1
2	74145771	GG	AG	1
2	74403459	CC	CG	1
2	74772446	GG	AG	1
2	74816217	GG	GT	1
2	74904100	GG	AG	1
2	75661806	GG	GT	1
2	76088319	GG	CG	1
2	76109954	GG	CG	1
2	76219532	GG	GT	1
2	76247036	AA	AG	1
2	76332332	AA	AT	1
2	76341018	CC	CT	1
2	76352857	AA	AG	1
2	76354534	CC	AC	1
2	76424908	CC	AC	1
2	76462109	CC	AC	1
[truncated: 13,501 more rows]

## Sheet: NCI-209 Segs
Segment	Chromosome	Start	Finish	Len	TotalCopyNumber	MinorCN	MajorCN	1	2	3	4
1	1	1	29152244	29.1522	1	0	1	51	0	0	0
2	1	29152244	30039615	0.887372	2	1	1	6	0	0	0
3	1	30039615	41173392	11.1338	4	1	3	21	5	17	0
4	1	41173392	42374905	1.20151	2	1	1	6	0	0	0
5	1	42374905	42581814	0.20691	4	1	3	0	4	0	0
6	1	42581814	44260752	1.67894	3	1	2	1	1	0	0
7	1	44260752	44277334	0.016583	5	1	4	0	0	0	0
8	1	44277334	48582373	4.30504	1	0	1	6	0	0	0
9	1	48582373	51278650	2.69628	3	1	2	4	7	0	0
10	1	51278650	54469641	3.19099	1	0	1	6	0	0	0
11	1	54469641	121190000	66.7204	2	1	1	529	0	0	0
12	1	121190000	247190000	126	2	1	1	822	0	0	0
13	2	1	24934450	24.9344	2	1	1	194	0	0	0
14	2	24934450	25797701	0.863252	1	0	1	1	0	0	0
15	2	25797701	85000000	59.2023	2	1	1	503	0	0	0
16	3	1	90000000	90	1	0	1	298	0	0	0
17	3	95000000	103587842	8.58784	3	1	2	45	26	0	0
18	3	103587842	109082942	5.4951	3	1	2	37	25	0	0
19	3	109082942	113482227	4.39929	4	1	3	26	10	14	0
20	3	113482227	114003843	0.521617	5	1	4	0	0	0	0
21	3	114003843	114494522	0.49068	4	1	3	0	1	2	0
22	3	114494522	114501744	0.007223	5	1	4	0	0	0	0
23	3	114501744	115818385	1.31664	4	1	3	3	1	3	0
24	3	115818385	132416138	16.5978	2	1	1	128	0	0	0
25	3	132416138	132905044	0.488907	1	0	1	1	0	0	0
26	3	132905044	176314039	43.409	2	1	1	372	0	0	0
27	3	176314039	177552380	1.23834	1	0	1	2	0	0	0
28	3	177552380	197226644	19.6743	2	1	1	106	0	0	0
29	4	1	49000000	49	2	1	1	483	0	0	0
30	4	53000000	112369010	59.369	1	0	1	211	0	0	0
31	4	112369010	114578709	2.2097	3	0	3	3	18	0	0
32	4	114578709	116258118	1.67941	2	0	2	6	0	0	0
33	4	116258118	131808245	15.5501	2	0	2	75	41	0	0
34	4	131808245	134092794	2.28455	3	1	2	20	24	0	0
35	4	134092794	134226253	0.13346	4	1	3	1	1	1	0
36	4	134226253	191133242	56.907	2	1	1	642	0	0	0
37	5	1	31435222	31.4352	3	1	2	256	128	0	0
38	5	31435222	32974799	1.53958	4	2	2	1	4	0	0
39	5	32974799	36442055	3.46726	4	2	2	8	15	0	0
40	5	36442055	36453831	0.011777	3	1	2	0	0	0	0
41	5	36453831	46000000	9.54617	3	1	2	41	23	0	0
42	5	50000000	68700000	18.7	1	0	1	57	0	0	0
43	5	68700000	87869841	19.1698	1	0	1	80	0	0	0
44	5	87869841	89155614	1.28577	1	0	1	6	0	0	0
45	5	89155614	94795860	5.64025	0	0	0	0	0	0	0
46	5	94795860	105820014	11.0242	1	0	1	60	0	0	0
47	5	105820014	107774672	1.95466	1	0	1	15	0	0	0
48	5	107774672	127084392	19.3097	1	0	1	86	0	0	0
49	5	127084392	127103530	0.019139	2	0	2	0	0	0	0
50	5	127103530	127423849	0.32032	3	0	3	0	0	0	0
51	5	127423849	165176590	37.7527	2	0	2	95	113	0	0
52	5	165176590	165055906	-0.120683	2	0	2	0	0	0	0
53	5	165055906	180643412	15.5875	2	0	2	25	24	0	0
54	6	1	22370032	22.37	3	1	2	0	0	0	0
55	6	22370032	24169735	1.7997	2	0	2	0	0	0	0
56	6	24169735	58800000	34.6303	3	1	2	92	66	0	0
57	6	61950000	91871507	29.9215	3	1	2	197	94	0	0
58	6	91871507	92750000	0.878494	2	1	1	12	0	0	0
59	7	1	58000000	58	3	1	2	219	127	0	0
60	7	58000000	62000000	4	2	1	1	0	0	0	0
61	7	62000000	107620000	45.62	2	1	1	273	0	0	0
62	7	107620000	120217809	12.5978	3	1	2	61	41	0	0
63	7	120217809	121189211	0.971403	1	0	1	1	0	0	0
64	7	121189211	158802031	37.6128	3	1	2	178	115	0	0
65	8	1	14835000	14.835	4	1	3	42	51	32	0
66	8	14835000	19103122	4.26812	3	1	2	15	16	0	0
67	8	19103122	41000000	21.8969	2	1	1	168	0	0	0
68	8	48000000	68499431	20.4994	2	1	1	172	0	0	0
69	8	68499431	68557135	0.057705	3	1	2	1	0	0	0
70	8	68557135	68644840	0.087706	4	1	3	2	0	1	0
71	8	68644840	144708306	76.0635	3	1	2	665	113	0	0
72	9	1	35000000	35	2	1	1	341	0	0	0
73	9	75000000	140031702	65.0317	2	1	1	387	0	0	0
74	10	43000000	135351110	92.3511	2	1	1	690	0	0	0
75	11	1	49000000	49	2	1	1	404	0	0	0
76	11	57000000	91724063	34.7241	2	1	1	213	0	0	0
77	11	91724063	92276475	0.552413	3	1	2	2	1	0	0
78	11	92276475	133235198	40.9587	2	1	1	286	0	0	0
79	12	1	758315	0.758315	2	1	1	0	0	0	0
80	12	758315	1196517	0.438203	1	0	1	0	0	0	0
81	12	1196517	34000000	32.8035	2	1	1	215	0	0	0
82	12	37000000	130397779	93.3978	2	1	1	675	0	0	0
83	13	18125948	110127039	92.0011	2	0	2	192	331	0	0
84	14	18089102	104000000	85.9109	2	1	1	661	0	0	0
85	15	18300000	75133652	56.8337	2	1	1	276	0	0	0
86	16	1	2097643	2.09764	2	1	1	3	0	0	0
87	16	2097643	3586018	1.48838	1	0	1	3	0	0	0
88	16	3586018	3825553	0.239536	0	0	0	0	0	0	0
89	16	3825553	3838811	0.013259	1	0	1	0	0	0	0
90	16	3838811	35000000	31.1612	2	1	1	144	0	0	0
91	16	44950000	66508334	21.5583	2	1	1	208	0	0	0
92	16	66508334	70984778	4.47645	1	0	1	6	0	0	0
93	16	70984778	88426085	17.4413	2	1	1	103	0	0	0
94	17	1	57781298	57.7813	2	0	2	119	109	0	0
95	17	57781298	58575326	0.794029	3	0	3	0	0	1	0
96	17	58575326	75271996	16.6967	2	0	2	34	18	0	0
97	18	1	1129626	1.12963	6	2	4	0	3	0	0
98	18	1129626	3792319	2.66269	4	2	2	18	11	0	0
99	18	3792319	15392000	11.5997	3	1	2	41	19	0	0
100	18	16783000	75133652	58.3507	3	1	2	296	193	0	0
101	19	1	24389000	24.389	2	1	1	96	0	0	0
102	19	24389000	61508969	37.12	2	1	1	120	0	0	0
103	20	1	26254000	26.254	2	1	1	152	0	0	0
104	20	29299000	62218718	32.9197	2	1	1	181	0	0	0
105	21	13268000	46211913	32.9439	2	1	1	246	0	0	0
106	22	14432600	24013478	9.58088	2	1	1	16	0	0	0
107	22	24013478	24310891	0.297414	1	0	1	0	0	0	0
108	22	24310891	48635552	24.3247	2	1	1	87	0	0	0

## Sheet: PD3904 Muts
Chromosome	Position	WT	Mut	Multiplicity
1	567311	TT	TC	1
1	2805412	TT	TC	1
1	2873010	CC	CG	1
1	3766047	GG	GA	1
1	3842153	GG	GA	1
1	3842433	GG	GA	1
1	4157286	CC	CG	1
1	4224446	CC	CG	1
1	4914193	GG	GC	1
1	5673741	CC	CG	1
1	6276584	GG	GA	1
1	7017060	GG	GA	1
1	9186623	AA	AC	1
1	10091571	TT	TC	1
1	11307538	AA	AC	1
1	11500629	AA	AC	1
1	11872183	TT	TA	1
1	12700186	CC	CG	1
1	12909158	GG	GC	1
1	14620169	GG	GA	1
1	15400995	GG	GC	1
1	15717952	GG	GA	1
1	17222497	AA	AG	1
1	17518575	TT	TC	1
1	17844525	TT	TG	1
1	18559610	CC	CG	1
1	19007487	CC	CG	1
1	19562269	CC	CG	1
1	20570146	GG	GC	1
1	21577379	AA	AT	1
1	21719494	AA	AT	1
1	22692702	CC	CA	1
1	24767999	CC	CA	1
1	25205043	CC	CA	1
1	25675883	TT	TC	1
1	26040414	AA	AC	1
1	26997543	AA	G	1
1	27871867	GG	A	1
1	29383566	AA	G	1
1	31773780	CC	A	1
1	32466290	CC	T	1
1	33147043	GG	A	1
1	35485994	CC	G	1
1	35603693	AA	T	1
1	36106194	TT	A	1
1	37285122	CC	A	1
1	39160850	CC	A	1
1	39160851	AA	G	1
1	39198397	CC	G	1
1	40194775	AA	T	1
1	40194776	CC	T	1
1	41931742	CC	T	1
1	42498974	GG	A	1
1	42551529	GG	A	1
1	44980500	AA	T	1
1	47532302	CC	T	1
1	48067007	GG	C	1
1	48124098	GG	A	1
1	51795272	CC	A	1
1	54552384	TT	G	1
1	54637237	CC	G	1
1	56060836	CC	T	1
1	56376959	AA	T	1
1	58346753	TT	G	1
1	58986361	GG	GC	1
1	59647239	AA	AG	1
1	60426866	CC	CA	1
1	60966774	CC	CG	1
1	61126882	CC	CG	1
1	61352454	AA	AG	1
1	62792282	CC	CA	1
1	64548440	GG	GT	1
1	64738397	CC	CT	1
1	64778524	GG	GT	1
1	64883181	TT	TA	1
1	65515171	CC	CA	1
1	65694425	AA	AG	1
1	65757368	GG	GT	1
1	66009001	TT	TG	1
1	66289733	AA	AC	1
1	66525000	GG	GA	1
1	66673968	TT	TC	1
1	67033523	TT	TC	1
1	67033524	CC	CA	1
1	67125062	GG	GT	1
1	68623479	AA	AC	1
1	69356616	GG	GT	1
1	70256828	CC	CG	1
1	71072464	TT	TA	1
1	71185428	CC	CT	1
1	71265758	GG	GC	1
1	71298142	TT	TG	1
1	71311364	GG	GT	1
1	71612841	CC	CG	1
1	72051116	GG	GT	1
1	72702079	GG	GA	1
1	73153835	GG	GA	1
1	73358134	CC	CA	1
1	74478318	GG	GC	1
1	75128466	TT	TA	1
1	75180356	GG	GT	1
1	75206158	TT	TG	1
1	75465282	GG	GT	1
1	75640802	CC	CA	1
1	75965735	AA	AG	1
1	76691904	GG	GT	1
1	76837362	TT	TC	1
1	77087301	TT	TA	1
1	77087302	CC	CT	1
1	77349515	CC	CA	1
1	78243122	AA	AT	1
1	78874106	AA	AC	1
1	79224636	TT	TG	1
1	79254357	CC	CT	1
1	79758981	TT	TC	1
1	79995773	CC	CT	1
1	80822068	AA	AC	1
1	80945201	GG	GA	1
1	81413395	CC	CA	1
1	82698328	CC	CT	1
1	82905550	AA	AG	1
1	83005057	CC	CA	1
1	83051166	AA	AT	1
1	86365145	TT	TG	1
1	86392681	TT	TG	1
1	86640852	AA	AG	1
1	87176722	TT	TA	1
1	87970280	AA	AT	1
1	89049459	AA	AG	1
1	89097249	GG	GA	1
1	89239804	TT	TA	1
1	89438692	TT	TC	1
1	90552399	TT	TC	1
1	91521685	AA	AG	1
1	91530450	GG	GT	1
1	91690371	CC	CT	1
1	92645955	AA	AG	1
1	92828225	TT	TG	1
1	94518624	CC	CG	1
1	94604853	AA	AG	1
1	95491887	TT	TA	1
1	96173796	TT	TA	1
1	96449634	CC	CT	1
1	97601353	AA	AT	1
1	98357786	GG	GA	1
1	99258149	GG	GA	1
1	99388951	AA	AC	1
1	100228127	GG	GT	1
1	100244343	CC	CA	1
1	100300777	CC	CG	1
1	100604892	GG	GC	1
1	101927002	TT	TA	1
1	101977218	CC	CT	1
1	102152388	TT	TC	1
1	102373626	AA	AG	1
1	102423446	TT	TC	1
1	104297267	TT	TC	1
1	104426727	GG	GT	1
1	104435417	GG	GA	1
1	104860981	AA	AT	1
1	106384664	GG	GA	1
1	107246965	GG	GA	1
1	107721015	CC	CG	1
1	108561802	CC	CG	1
1	109148203	CC	CT	1
1	110156612	AA	AG	1
1	110426995	CC	CT	1
1	110476318	GG	GA	1
1	111242529	CC	CT	1
1	113451428	GG	GC	1
1	115133733	CC	CT	1
1	115352583	GG	GT	1
1	116220425	CC	CT	1
1	116296646	TT	TG	1
1	116385714	CC	CT	1
1	116940625	CC	CT	1
1	117621087	AA	AT	1
1	117899891	AA	AT	1
1	118041755	CC	CT	1
1	118661176	CC	CG	1
1	119449695	CC	CA	1
1	119976763	TT	TA	1
1	120434661	CC	CA	1
1	121286269	CC	CT	1
1	121376795	AA	AC	1
1	121462002	GG	GC	1
1	143251918	AA	AG	1
1	143286394	TT	TA	1
1	143442946	AA	AG	1
1	145202900	CC	CA	1
1	148252477	TT	TG	1
1	149704028	AA	AG	1
1	150299998	CC	CT	1
1	150466595	AA	AG	1
1	150796609	GG	GT	1
1	150812963	TT	TC	1
1	151225942	GG	GT	1
1	152238792	CC	CA	1
1	152898788	GG	GC	1
1	152996126	GG	GA	1
1	153139430	AA	AG	1
1	154459230	CC	CT	1
1	154683996	GG	GA	1
1	154695912	GG	GT	1
1	155390991	GG	GA	1
1	155977585	CC	CT	1
1	156239163	TT	TC	1
1	156623460	TT	TC	1
1	157033214	AA	AC	1
1	157253063	AA	AG	1
1	157333063	CC	CT	1
1	157577010	AA	AT	1
1	158013685	AA	AG	1
1	158909654	GG	GT	1
1	158909655	GG	GT	1
1	159269355	AA	AC	1
1	160793821	CC	CA	1
1	161529504	AA	AC	1
1	161760047	GG	GA	1
1	161808868	AA	AC	1
1	163254137	CC	CT	1
1	163827621	CC	CG	1
1	164416429	GG	GA	1
1	165556431	CC	CG	1
1	165930623	AA	AG	1
1	166099032	CC	CA	1
1	166099033	CC	CA	1
1	166099199	CC	CA	1
1	166500039	CC	CG	1
1	166802205	CC	CT	1
1	167477455	AA	AC	1
1	167696904	CC	CT	1
1	168668133	GG	GC	1
1	168813659	CC	CA	1
1	168848801	CC	CT	1
1	169126437	GG	GC	1
1	170368444	GG	GT	1
1	170407858	GG	GT	1
1	170430637	TT	TG	1
1	170682870	TT	TC	1
1	170799175	CC	CT	1
1	172632611	TT	TG	1
1	172865206	GG	GT	1
1	173128422	TT	TA	1
1	173488231	TT	TA	1
1	173757528	CC	CA	1
1	174622746	CC	CA	1
1	175233943	CC	CG	1
1	175688079	GG	GA	1
1	177051757	TT	TA	1
1	177267620	TT	TA	1
1	177469248	CC	CA	1
1	178039590	CC	CA	1
1	178039591	TT	TA	1
1	178490509	GG	GA	1
1	178908513	GG	GA	1
1	179996402	GG	GA	1
1	180018810	CC	CA	1
1	180367272	GG	GC	1
1	181333381	AA	AC	1
1	182311464	TT	TC	1
1	183293049	TT	TG	1
1	183786580	GG	GT	1
1	185152954	AA	AC	1
1	185661357	AA	AC	1
1	186005576	CC	CT	1
1	186879869	GG	GA	1
1	186897220	AA	AG	1
1	187007173	CC	CT	1
1	187103938	CC	CA	1
1	187941144	CC	CA	1
1	188284048	CC	CG	1
1	188632852	TT	TA	1
1	188840202	AA	AT	1
1	189105397	CC	CG	1
1	189191543	TT	TC	1
1	190641816	GG	GT	1
1	190741186	CC	CA	1
1	190908005	CC	CG	1
1	191084440	AA	AG	1
1	191367150	GG	GT	1
1	191530008	GG	GA	1
1	192068125	TT	TG	1
1	192192661	AA	AT	1
1	192912648	AA	AT	1
1	193526070	GG	GA	1
1	195947233	GG	GA	1
1	196442338	CC	CG	1
1	196486724	GG	GA	1
1	196675695	TT	TG	1
1	196675703	AA	AT	1
1	197056695	CC	CA	1
1	197201859	GG	GT	1
1	198234008	TT	TC	1
1	199293765	CC	CA	1
1	199414488	GG	GC	1
1	199824992	CC	CCA	1
1	199876748	GG	GGT	1
1	200134799	TT	TTG	1
1	201126128	GG	GGT	1
1	201179524	GG	GGA	1
1	201289688	AA	AAT	1
1	203326190	CC	CCG	1
1	203589041	CC	CCG	1
1	204316842	CC	CCA	1
1	204740806	GG	GGT	1
1	205218537	CC	CCT	1
1	205722604	AA	AAT	1
1	205765590	CC	CCT	1
1	205765591	CC	CCG	1
1	205811367	CC	CCA	1
1	206758870	CC	CCT	1
1	206969084	CC	CCA	1
1	207174278	TT	TTG	1
1	207829173	AA	AAT	1
1	207905044	CC	CCT	1
1	208152123	CC	CCT	1
1	208210200	GG	GAA	2
1	208363525	TT	TTG	1
1	208364536	GG	GGT	1
1	208467006	GG	GGT	1
1	209010412	TT	TTA	1
1	209038574	GG	GGA	1
1	209038575	TT	TTC	1
1	209054847	TT	TTC	1
1	209461973	GG	GGA	1
1	209715312	TT	TTG	1
1	209850604	GG	GGC	1
1	209850606	CC	CCG	1
1	209850607	TT	TTA	1
1	209952921	AA	AAG	1
1	210791449	GG	GGC	1
1	211510048	CC	CCA	1
1	211641862	GG	CC	2
1	211883279	AA	AG	1
1	213087963	TT	TA	1
1	213910421	GG	GC	1
1	213924526	TT	TG	1
1	214112566	TT	TC	1
1	214356720	TT	TC	1
1	214445281	AA	AT	1
1	216184837	CC	CT	1
1	216387571	AA	AT	1
1	216387867	TT	TG	1
1	216388265	GG	GA	1
1	216534265	AA	AT	1
1	216608402	AA	AC	1
1	216821836	CC	CA	1
1	216974161	CC	CT	1
1	217627472	AA	AC	1
1	219167983	GG	GC	1
1	219167988	AA	AG	1
1	219853357	CC	CG	1
1	221431997	TT	TG	1
1	221732070	TT	TC	1
1	221732074	AA	AC	1
1	221959183	AA	AT	1
1	223065816	AA	AC	1
1	223390538	CC	CT	1
1	224011730	CC	CG	1
1	225012887	CC	CA	1
1	226395979	GG	GT	1
1	226638079	CC	CT	1
1	227805754	GG	GA	1
1	229047321	CC	CA	1
1	229328296	TT	TC	1
1	230167943	GG	GC	1
1	230557895	CC	CG	1
1	231056282	CC	CA	1
1	231612777	TT	TG	1
1	231662578	GG	GT	1
1	232316849	CC	CT	1
1	232502546	AA	AT	1
1	232558940	AA	AG	1
1	232856948	CC	CT	1
1	234804045	CC	CG	1
1	236000632	TT	TA	1
1	236726633	AA	AC	1
1	237237386	GG	GA	1
1	237335798	GG	GT	1
1	238317142	AA	AG	1
1	238348696	GG	GC	1
1	238373358	GG	GC	1
1	239748281	TT	TG	1
1	239805206	GG	GT	1
1	240195796	CC	CG	1
1	240196792	CC	CA	1
1	240384965	TT	TG	1
1	240402855	AA	AT	1
1	240621815	CC	CT	1
1	240904430	CC	CG	1
1	241286335	CC	CT	1
1	241392797	GG	GA	1
1	242247475	GG	GT	1
1	242911026	CC	CG	1
1	242972152	CC	CT	1
1	243241710	GG	GT	1
1	243784564	CC	CT	1
1	244225739	AA	AC	1
1	244358886	CC	CG	1
1	244514982	GG	GT	1
1	244898485	AA	AC	1
1	245290635	AA	AG	1
1	245758361	TT	TA	1
1	246321339	CC	CG	1
1	246439076	GG	GT	1
1	247502361	GG	GC	1
1	247539180	CC	CT	1
1	247571020	CC	CT	1
1	247639807	CC	CT	1
1	248394263	TT	TA	1
1	248606486	CC	CA	1
1	248760010	CC	CT	1
1	249108256	CC	CA	1
2	356243	CC	CG	1
2	418318	CC	CG	1
2	1631258	TT	TC	1
2	1792173	TT	TA	1
2	1809466	TT	TC	1
2	1815973	GG	GA	1
2	2207960	GG	GA	1
2	2490463	GG	GT	1
2	2681119	AA	AT	1
2	2860379	AA	AC	1
2	2860380	GG	GT	1
2	3057094	CC	CT	1
2	3713618	TT	TA	1
2	3933966	GG	GC	1
2	4034800	TT	TC	1
2	4913516	CC	CA	1
2	5701828	AA	AG	1
2	6566847	GG	GC	1
2	10009543	GG	GGC	1
2	10019013	GG	GGA	1
2	10611505	GG	GTT	2
2	11254594	TT	TAA	2
2	11468085	AA	AAT	1
2	11514538	AA	AAC	1
2	11644592	GG	GGC	1
2	11792973	CC	CTT	2
2	11879156	GG	GTT	2
2	11949402	AA	AAT	1
2	12402986	TT	TTG	1
2	12902292	TT	TAA	2
2	13074675	CC	CAA	2
2	13257746	TT	TTC	1
2	13521705	GG	GGT	1
2	13595052	TT	TTG	1
2	13924976	TT	TTC	1
2	14179830	GG	GGT	1
2	15294795	CC	CCA	1
2	15365630	CC	CCT	1
2	15921743	GG	GGC	1
2	15935350	AA	AAC	1
2	16206955	CC	CGG	2
2	16750055	GG	GGC	1
2	16971413	AA	AAT	1
2	17159358	AA	AAG	1
2	17226714	AA	AAC	1
2	17606342	TT	TAA	2
2	17931998	TT	TTG	1
2	18296205	TT	TGG	2
2	18340755	TT	TTG	1
2	18779070	GG	GTT	2
2	20562855	CC	CCA	1
2	20970325	CC	CG	1
2	21523378	TT	TA	1
2	22126911	TT	TG	1
2	22661921	TT	TA	1
2	23044590	GG	GT	1
2	23127111	TT	TA	1
2	23586727	AA	AC	1
2	23586729	CC	CG	1
2	25064571	AA	AC	1
2	25589111	AA	AG	1
2	25732270	GG	GC	1
2	25855540	AA	AT	1
2	26580502	AA	AT	1
2	28897756	GG	GC	1
2	28948454	GG	GC	1
2	29702715	GG	GC	1
2	29907997	GG	GC	1
2	30478251	CC	CG	1
2	30877118	GG	GC	1
2	31222972	TT	TG	1
2	32083109	GG	GA	1
2	32987051	TT	TA	1
2	33170235	GG	GT	1
2	33206216	CC	CG	1
2	33368679	CC	CT	1
2	33548694	TT	TA	1
2	34314106	TT	TC	1
2	34543431	GG	GT	1
2	34766674	CC	CA	1
2	35059952	CC	CT	1
2	35367020	AA	AC	1
2	36876459	AA	AC	1
2	38166960	AA	AT	1
2	39441607	TT	TC	1
2	39908487	CC	CT	1
2	39929492	AA	AC	1
2	41380457	AA	AC	1
2	42059234	TT	TC	1
2	42360256	TT	TC	1
2	42859044	GG	GA	1
2	42859280	AA	AT	1
2	44367323	GG	GC	1
2	45039542	TT	TG	1
2	46781064	CC	CA	1
2	46864816	GG	GA	1
2	46869914	GG	GA	1
2	47343535	TT	TA	1
2	48185104	AA	AT	1
2	48389337	TT	TG	1
2	48412345	CC	CA	1
2	49740768	GG	GC	1
2	49741620	GG	GA	1
2	49800915	TT	TG	1
2	49803068	CC	CG	1
2	49822913	TT	TC	1
2	49864081	CC	CA	1
2	50153809	GG	GC	1
2	50650849	GG	GA	1
2	51868912	AA	AG	1
2	52553118	AA	AG	1
2	52772662	GG	GA	1
2	53274038	CC	CT	1
2	53293425	CC	CA	1
2	55523891	GG	GT	1
2	56795978	CC	CT	1
2	56839114	AA	AC	1
2	57292493	TT	TC	1
2	57783466	AA	AT	1
2	57783478	GG	GC	1
2	58220632	TT	TA	1
2	59423599	CC	CG	1
2	59824698	AA	AT	1
2	60070112	AA	AG	1
2	62269157	AA	AC	1
2	62491251	GG	GC	1
2	63304471	CC	CT	1
2	63846957	AA	AT	1
2	64769391	GG	GA	1
2	66222845	CC	CT	1
2	66238936	TT	TC	1
2	66539609	CC	CG	1
2	66662554	GG	GA	1
2	66886578	CC	CG	1
2	67215279	CC	CG	1
2	67335271	GG	GT	1
2	67577920	CC	CA	1
2	67604367	AA	AT	1
2	67756518	AA	AC	1
2	67932604	CC	CG	1
2	68010655	GG	GC	1
2	68032775	AA	AT	1
2	68076732	CC	CT	1
2	68342422	CC	CT	1
2	68736242	TT	TG	1
2	70319190	TT	TG	1
2	70374419	CC	CT	1
2	71741537	CC	CG	1
2	71822978	CC	CG	1
2	71852967	AA	AT	1
2	72584594	TT	TG	1
2	72965838	TT	TG	1
2	73118856	TT	TA	1
2	73939191	TT	TA	1
2	74430718	TT	TC	1
2	75416524	AA	AC	1
2	75603455	CC	CG	1
2	75963646	AA	AG	1
2	76097439	GG	GC	1
2	76205612	CC	CT	1
2	76403300	GG	GT	1
2	76864464	CC	CG	1
2	77480629	CC	CT	1
2	77919546	CC	CT	1
2	78411286	AA	AG	1
2	78526159	GG	GA	1
2	79229173	TT	TA	1
2	79258736	AA	AG	1
2	79801984	TT	TG	1
2	80212077	AA	AC	1
2	80235423	CC	CT	1
2	80402221	CC	CG	1
2	80412923	TT	TG	1
2	81019187	AA	AG	1
2	81624239	AA	AC	1
2	82592073	GG	GA	1
2	82943444	GG	GA	1
2	84287651	CC	CA	1
2	84827201	GG	GT	1
2	84893527	GG	GT	1
2	85940153	CC	CT	1
2	85951141	AA	AT	1
2	85975338	AA	AT	1
2	86849618	AA	AG	1
2	87170899	CC	CG	1
2	88709679	GG	GT	1
2	88824241	AA	AG	1
2	89856431	CC	CA	1
2	90425768	AA	AT	1
2	91703184	CC	CT	1
2	91714660	AA	AC	1
2	92191129	AA	AC	1
2	95397469	GG	GT	1
2	96428271	TT	TA	1
2	96563294	AA	AC	1
2	97003838	TT	TC	1
2	97074285	AA	AC	1
2	97139437	TT	TG	1
2	97857009	GG	GT	1
2	99709106	AA	AC	1
2	100556038	GG	GA	1
2	100630724	AA	AG	1
2	100876051	CC	CT	1
2	101171748	CC	CA	1
2	101913064	GG	GA	1
2	102131676	CC	CA	1
2	102552327	GG	GT	1
2	102690287	CC	CA	1
2	103896958	TT	TC	1
2	104021749	CC	CT	1
2	104094903	CC	CG	1
2	105147283	CC	CG	1
2	105503798	AA	AC	1
2	106523952	CC	CT	1
2	108285470	AA	AT	1
2	108504145	CC	CA	1
2	108751814	AA	AT	1
2	108919489	GG	GC	1
2	109137845	AA	AG	1
2	109902584	GG	GA	1
2	110356002	TT	TA	1
2	110914958	TT	TG	1
2	111440310	AA	AT	1
2	115187755	CC	CT	1
2	115623452	GG	GT	1
2	115814481	GG	GT	1
2	115891816	CC	CT	1
2	116452594	CC	CA	1
2	117202889	CC	CT	1
2	117461650	TT	TA	1
2	117745157	GG	GA	1
2	117938296	CC	CA	1
2	118186017	GG	GA	1
2	118356853	CC	CA	1
2	118641395	TT	TC	1
2	118802608	AA	AC	1
2	119250692	GG	GA	1
2	119651244	AA	AG	1
2	119868714	GG	GC	1
2	120325269	CC	CA	1
2	122735725	AA	AC	1
2	122839551	GG	GA	1
2	123838045	TT	TC	1
2	124374697	GG	GA	1
2	124859240	GG	GA	1
2	124859272	TT	TC	1
2	125124819	AA	AT	1
2	125933937	TT	TA	1
2	126897109	TT	TC	1
2	127092675	GG	GC	1
2	127484568	CC	CA	1
2	127964674	GG	GA	1
2	128687830	TT	TA	1
2	128891264	AA	AT	1
2	128900575	TT	TA	1
2	129245360	TT	TC	1
2	129936761	GG	GA	1
2	129949124	AA	AG	1
2	130005758	CC	CA	1
2	130045224	CC	CA	1
2	130132839	CC	CG	1
2	130239655	AA	AG	1
2	130728672	CC	CG	1
2	131479284	TT	TA	1
2	132159472	CC	CA	1
2	133274696	AA	AG	1
2	134205764	GG	GA	1
2	135012643	TT	TA	1
2	135304833	GG	GC	1
2	135582496	GG	GT	1
2	136059773	TT	TA	1
2	136317835	AA	AG	1
2	137310754	AA	AG	1
2	137471639	GG	GA	1
2	139321334	TT	TA	1
2	139642330	GG	GA	1
2	139697288	GG	GC	1
2	139701778	AA	AC	1
2	140700122	CC	CA	1
2	140701578	CC	CA	1
2	140775788	AA	AG	1
2	141720707	TT	TA	1
2	142851452	GG	GC	1
2	143151964	GG	GC	1
2	143309290	CC	CA	1
2	144140212	GG	GT	1
2	144932179	TT	TG	1
2	145735715	AA	AC	1
2	145764942	GG	GA	1
2	145990262	GG	GT	1
2	146460461	AA	AT	1
2	146631477	CC	CT	1
2	146698863	AA	AT	1
2	148186273	CC	CA	1
2	148363774	CC	CA	1
2	149354207	CC	CT	1
2	149391154	GG	GT	1
2	149907215	AA	AG	1
2	151591848	TT	TA	1
2	152485344	CC	CG	1
2	152620006	GG	GC	1
2	153440204	GG	GA	1
2	153471858	CC	CA	1
2	153688952	GG	GC	1
2	156039004	CC	CT	1
2	156620824	GG	GA	1
2	158108603	AA	AG	1
2	158690554	CC	CA	1
2	159835580	GG	GA	1
2	159991852	CC	CG	1
2	161469972	CC	CT	1
2	161493354	CC	CT	1
2	162758551	GG	GA	1
2	165732874	GG	GC	1
2	167091768	CC	CT	1
2	167727665	AA	AT	1
2	167924558	CC	CT	1
2	168096516	GG	GT	1
2	168260193	GG	GA	1
2	168435673	TT	TC	1
2	168538486	CC	CG	1
2	169004857	GG	GA	1
2	169365521	GG	GC	1
2	170119599	TT	TG	1
2	172707562	AA	AG	1
2	174257051	AA	AG	1
2	174719474	CC	CT	1
2	174741520	GG	GC	1
2	175444534	CC	CT	1
2	175555268	GG	GA	1
2	175897848	GG	GT	1
2	175907623	CC	CG	1
2	176441673	CC	CA	1
2	176718061	CC	CT	1
2	177547625	TT	TC	1
2	177773078	GG	GC	1
2	178423513	AA	AG	1
2	178498164	AA	AT	1
2	178687383	TT	TA	1
2	178861103	CC	CT	1
2	179197770	TT	TG	1
2	179198525	AA	AC	1
2	179223683	GG	GC	1
2	179549761	GG	GC	1
2	180063321	TT	TA	1
2	180135448	GG	GA	1
2	180353621	AA	AC	1
2	180487953	CC	CT	1
2	180537501	CC	CT	1
2	181095973	CC	CA	1
2	181953950	CC	CA	1
2	182581443	CC	CT	1
2	182732919	AA	AT	1
2	183086111	TT	TC	1
2	183086112	CC	CA	1
2	183712016	AA	AG	1
2	184249613	TT	TG	1
2	184770694	AA	AC	1
2	185026041	AA	AC	1
2	186408301	TT	TG	1
2	187312851	GG	GT	1
2	187589308	CC	CT	1
2	189590616	TT	TC	1
2	191976468	GG	GC	1
2	192864488	GG	GA	1
2	192976329	TT	TA	1
2	192980541	AA	AC	1
2	193332001	AA	AG	1
2	193405464	GG	GA	1
2	193426971	CC	CT	1
2	193626586	GG	GT	1
2	193755319	GG	GA	1
2	193945474	CC	CT	1
2	194205127	CC	CT	1
2	194781001	CC	CT	1
2	195583933	TT	TC	1
2	197358743	GG	GT	1
2	197410983	AA	AC	1
2	197529304	GG	GA	1
2	197716732	AA	AC	1
2	198566740	AA	AT	1
2	198768774	AA	AC	1
2	198974268	CC	CG	1
2	199765360	GG	GA	1
2	200723824	CC	CA	1
2	200889837	AA	AT	1
2	201495008	GG	GT	1
2	201770724	TT	TA	1
2	202025454	GG	GT	1
2	202408973	GG	GC	1
2	202690549	TT	TA	1
2	202715430	AA	AC	1
2	203327619	AA	AG	1
2	203484985	GG	GT	1
2	203700427	CC	CA	1
2	204892430	AA	AC	1
2	204965853	AA	AG	1
2	205161452	CC	CA	1
2	205224765	CC	CT	1
2	205421833	AA	AG	1
2	205524859	CC	CT	1
2	206761581	CC	CT	1
2	206836325	CC	CT	1
2	207392159	GG	GC	1
2	207440025	CC	CA	1
2	207896609	GG	GA	1
2	208034735	CC	CG	1
2	209264224	TT	TG	1
2	209426210	AA	AC	1
2	211914778	GG	GA	1
2	212042623	GG	GT	1
2	214025649	TT	TA	1
2	214144720	CC	CG	1
2	214868535	AA	AG	1
2	215194452	AA	AG	1
2	215332183	CC	CG	1
2	215341115	TT	TC	1
2	215343664	GG	GA	1
2	216197193	TT	TC	1
2	216780983	AA	AC	1
2	217680095	CC	CT	1
2	220516231	CC	CG	1
2	220570500	CC	CT	1
2	221379743	GG	GA	1
2	221669066	AA	AT	1
2	221762877	TT	TA	1
2	222008154	CC	CG	1
2	222390448	TT	TA	1
2	222667850	AA	AT	1
2	223124354	TT	TA	1
2	223146308	GG	GA	1
2	223225698	AA	AC	1
2	223450711	CC	CG	1
2	224093772	CC	CG	1
2	224748926	TT	TA	1
2	225038495	CC	CA	1
2	225308222	GG	GC	1
2	225754780	GG	GC	1
2	226227379	CC	CA	1
2	226874665	AA	AG	1
2	227420916	AA	AG	1
2	227718832	GG	GT	1
2	227744170	GG	GA	1
2	228052499	CC	CG	1
2	228420266	CC	CT	1
2	228672662	GG	GA	1
2	228855780	GG	GT	1
2	228971867	GG	GA	1
2	229168081	GG	GT	1
2	229562583	CC	CT	1
2	229965995	AA	AG	1
2	230216630	GG	GT	1
2	231204533	CC	CG	1
2	231463504	AA	AC	1
2	231660649	GG	GT	1
2	232406878	CC	CT	1
2	233800848	GG	GT	1
2	233855250	CC	CT	1
2	235080774	TT	TG	1
2	235276160	AA	AT	1
2	235536798	AA	AT	1
2	235678162	CC	CA	1
2	235948076	AA	AC	1
2	236042449	CC	CT	1
2	236242911	CC	CT	1
2	237240044	GG	GT	1
2	237733987	AA	AG	1
2	237989222	TT	TC	1
2	238283918	GG	GC	1
2	238290349	CC	CA	1
2	238551128	GG	GA	1
2	239354293	TT	TC	1
2	239781559	GG	GT	1
2	239884269	GG	GA	1
2	240327926	AA	AC	1
2	240610712	CC	CT	1
2	240758928	GG	GT	1
2	241805066	CC	CT	1
2	241932760	GG	GA	1
2	242434111	GG	GC	1
3	669998	CC	CAA	2
3	1333866	AA	AAC	1
3	1359641	CC	CAA	2
3	1508204	AA	AAC	1
3	2550431	CC	CCG	1
3	2792061	CC	CTT	2
3	3029453	CC	CAA	2
3	3341635	CC	CCA	1
3	3342762	CC	CTT	2
3	3353734	AA	AAG	1
3	3805220	TT	TTC	1
3	3897668	GG	GGT	1
3	4985644	GG	GGA	1
3	5049039	AA	AAC	1
3	5318248	GG	GGC	1
3	5419138	TT	TTA	1
3	6330340	TT	TCC	2
3	6541670	CC	CCT	1
3	7906826	GG	GTT	2
3	8002618	CC	CAA	2
3	8248226	CC	CCT	1
3	8711386	CC	CCA	1
3	8852894	CC	CCG	1
3	8887902	CC	CCG	1
3	10400358	CC	CCG	1
3	10544057	GG	GGT	1
3	10880974	TT	TGG	2
3	11736526	CC	CCT	1
3	12094146	GG	GGC	1
3	12394665	GG	GAA	2
3	12575118	CC	CAA	2
3	13510059	GG	GCC	2
3	14341042	GG	GGT	1
3	14763118	GG	GAA	2
3	15053482	AA	AAG	1
3	15228841	GG	GAA	2
3	15230142	AA	AAG	1
3	15333595	CC	CCA	1
3	16245513	AA	AAC	1
3	16468632	TT	TTG	1
3	16563744	CC	CCT	1
3	17054663	CC	CCT	1
3	17097340	GG	GGA	1
3	17289480	AA	AAT	1
3	17911295	GG	GCC	2
3	18293885	CC	CTT	2
3	18392040	GG	GTT	2
3	18480095	AA	AAT	1
3	18480096	CC	CCT	1
3	18759904	CC	CCA	1
3	18899721	TT	TAA	2
3	19198363	GG	GC	1
3	19668660	CC	CT	1
3	20944529	GG	GC	1
3	21814124	TT	TC	1
3	22077607	CC	CT	1
3	22222335	AA	AC	1
3	22346000	CC	CG	1
3	22911289	AA	AT	1
3	23464547	GG	GA	1
3	23678367	GG	GC	1
3	24626300	CC	CT	1
3	26139110	GG	GT	1
3	26143946	AA	AG	1
3	26642313	CC	CG	1
3	28170066	AA	AG	1
3	29417692	GG	GT	1
3	29785177	TT	TC	1
3	30317305	TT	TC	1
3	31070707	GG	GA	1
3	31338156	GG	GT	1
3	31508549	GG	GT	1
3	31953408	TT	TG	1
3	32226833	TT	TG	1
3	32892125	TT	TA	1
3	34084085	TT	TG	1
3	34564293	GG	GA	1
3	35265263	CC	CA	1
3	35638653	CC	CT	1
3	36182151	TT	TA	1
3	36448664	TT	TA	1
3	36815740	AA	AG	1
3	37625743	CC	CA	1
3	37868127	CC	CA	1
3	38785709	TT	TG	1
3	39299231	CC	CT	1
3	39672243	CC	CA	1
3	40875706	AA	AC	1
3	41536806	CC	CG	1
3	41631532	CC	CA	1
3	43783435	GG	GC	1
3	43836049	GG	GC	1
3	43964783	CC	CA	1
3	43976342	GG	GC	1
3	44295596	TT	TG	1
3	44406928	CC	CT	1
3	44705670	AA	AT	1
3	44886165	GG	GC	1
3	45522593	GG	GA	1
3	46010144	CC	CT	1
3	47647485	TT	TA	1
3	48043922	TT	TC	1
3	48054130	CC	CT	1
3	48617263	CC	CG	1
3	48805680	GG	GC	1
3	50570687	CC	CT	1
3	50811518	CC	CG	1
3	50821269	TT	TC	1
3	50840586	GG	GT	1
3	51380593	CC	CA	1
3	51731806	GG	GA	1
3	52258744	CC	CT	1
3	52301592	TT	TA	1
3	52385444	CC	CG	1
3	52830632	CC	CA	1
3	53687667	GG	GT	1
3	55008496	CC	CA	1
3	56455864	CC	CA	1
3	56930932	AA	AT	1
3	57387445	AA	AG	1
3	58168791	AA	AC	1
3	58197632	CC	CT	1
3	58406211	CC	CG	1
3	58616840	CC	CT	1
3	60412975	GG	GA	1
3	60507152	TT	TA	1
3	60731579	CC	CT	1
3	61778697	AA	AG	1
3	62426383	GG	GT	1
3	62625655	CC	CA	1
3	62922597	CC	CA	1
3	63497450	CC	CA	1
3	63906553	AA	AG	1
3	65031144	GG	GT	1
3	65031159	AA	AT	1
3	65062173	TT	TA	1
3	65769742	GG	GC	1
3	66958570	GG	GA	1
3	66969145	AA	AG	1
3	66977277	GG	GT	1
3	67498125	CC	CG	1
3	68654653	GG	GA	1
3	68692362	GG	GT	1
3	68940569	GG	GT	1
3	69165636	TT	TA	1
3	70047711	TT	TA	1
3	70787328	AA	AC	1
3	71434257	GG	GA	1
3	71729074	CC	CT	1
3	72112402	GG	GT	1
3	72112420	GG	GT	1
3	72235897	GG	GC	1
3	72394074	AA	AC	1
3	72580643	GG	GC	1
3	72730659	GG	GC	1
3	72989680	TT	TG	1
3	73181551	TT	TC	1
3	73188212	CC	CT	1
3	73216459	AA	AC	1
3	74175393	AA	AC	1
3	74195155	TT	TC	1
3	74916634	CC	CA	1
3	75092262	AA	AT	1
3	76290249	AA	AG	1
3	76434048	AA	AC	1
3	76495491	GG	GC	1
3	76524721	AA	AG	1
3	77045078	TT	TC	1
3	77392159	GG	GA	1
3	77967547	GG	GT	1
3	78027673	GG	GT	1
3	78234110	TT	TG	1
3	78364250	GG	GA	1
3	79274342	TT	TC	1
3	79339767	CC	CA	1
3	79682929	AA	AG	1
3	81026855	TT	TG	1
3	81300933	AA	AG	1
3	82233254	TT	TA	1
3	83453886	AA	AT	1
3	84319255	AA	AT	1
3	84358069	TT	TG	1
3	85672711	GG	GT	1
3	85704679	CC	CA	1
3	85887647	TT	TA	1
3	86048268	GG	GA	1
3	86524902	CC	CT	1
3	86757295	TT	TG	1
3	87811563	TT	TG	1
3	88211680	TT	TC	1
3	88635826	CC	CT	1
3	90146997	CC	CA	1
3	90256902	CC	CT	1
3	93716768	TT	TG	1
3	93872364	CC	CG	1
3	95899412	TT	TG	1
3	96123155	GG	GT	1
3	96186220	GG	GT	1
3	96443521	AA	AT	1
3	97237098	AA	AT	1
3	97360594	AA	AG	1
3	98093908	AA	AT	1
3	100030690	CC	CA	1
3	100030979	CC	CG	1
3	100830499	AA	AG	1
3	101190161	GG	GC	1
3	101318368	TT	TG	1
3	102715260	GG	GC	1
3	102990609	GG	GA	1
3	104295096	GG	GA	1
3	104348126	TT	TA	1
3	104726189	GG	GA	1
3	105277378	AA	AC	1
3	106170745	CC	CA	1
3	106377623	TT	TA	1
3	107065044	GG	GA	1
3	107269775	TT	TG	1
3	107421333	GG	GT	1
3	108272421	GG	GA	1
3	109309577	AA	AT	1
3	109489609	CC	CT	1
3	109583814	AA	AC	1
3	109596339	CC	CA	1
3	110307918	TT	TC	1
3	110949690	AA	AT	1
3	111648162	TT	TA	1
3	113894042	TT	TTG	1
3	113958890	TT	TTA	1
3	114906540	CC	CT	1
3	115120682	TT	TA	1
3	115636053	AA	AG	1
3	116032120	CC	CA	1
3	116152038	TT	TA	1
3	116302336	GG	GC	1
3	116792959	CC	CT	1
3	116796218	TT	TA	1
3	117225722	TT	TA	1
3	117685937	TT	TG	1
3	117901281	GG	GA	1
3	118515518	TT	TA	1
3	119218428	CC	CT	1
3	119340328	CC	CA	1
3	121685610	AA	AT	1
3	121796860	TT	TG	1
3	122046697	AA	AC	1
3	122518373	TT	TG	1
3	123689663	CC	CA	1
3	125327017	CC	CT	1
3	125731976	GG	GT	1
3	126019747	GG	GC	1
3	127021745	TT	TC	1
3	127351468	GG	GA	1
3	127755335	CC	CA	1
3	127814997	GG	GC	1
3	128802192	TT	TA	1
3	129508271	CC	CT	1
3	129814602	GG	GC	1
3	130055836	TT	TG	1
3	130435927	AA	AT	1
3	130816733	CC	CT	1
3	131320126	CC	CA	1
3	131716749	GG	GC	1
3	132096182	CC	CT	1
3	132496788	CC	CA	1
3	133516000	TT	TG	1
3	134697713	GG	GA	1
3	135140123	AA	AC	1
3	135860364	TT	TG	1
3	136076058	GG	GA	1
3	136341849	GG	GA	1
3	136594937	TT	TA	1
3	136935120	GG	GA	1
3	137067846	CC	CT	1
3	137402948	CC	CA	1
3	137643961	TT	TA	1
3	138671522	AA	AT	1
3	138762817	CC	CA	1
3	139167197	GG	GC	1
3	140039688	AA	AG	1
3	140312658	TT	TG	1
3	140858246	TT	TA	1
3	141132567	AA	AT	1
3	141178628	GG	GA	1
3	141624248	CC	CA	1
3	142262030	TT	TC	1
3	142378661	CC	CG	1
3	142645250	AA	AT	1
3	142650788	GG	GA	1
3	144461680	AA	AG	1
3	144640724	GG	GT	1
3	145105165	GG	GT	1
3	146136043	TT	TA	1
3	146289322	GG	GA	1
3	146749563	CC	CT	1
3	147288799	CC	CA	1
3	147290125	CC	CA	1
3	148288759	CC	CT	1
3	148857195	GG	GT	1
3	149743681	GG	GT	1
3	149754170	TT	TG	1
3	150505189	AA	AT	1
3	151320422	CC	CT	1
3	151696670	CC	CG	1
3	152719118	GG	GA	1
3	152993554	AA	AG	1
3	152998408	AA	AT	1
3	153708138	GG	GC	1
3	153804268	CC	CA	1
3	153804269	AA	AG	1
3	154964186	AA	AT	1
3	155047530	GG	GA	1
3	156250118	CC	CT	1
3	156660428	CC	CT	1
3	157143349	GG	GA	1
3	157284684	CC	CG	1
3	157905756	GG	GT	1
3	158213390	TT	TG	1
3	160182198	GG	GA	1
3	160818734	AA	AG	1
3	161218053	CC	CT	1
3	161724393	AA	AC	1
3	161808799	TT	TC	1
3	162670344	CC	CA	1
3	163038106	CC	CA	1
3	163071590	CC	CA	1
3	163410694	AA	AG	1
3	163732651	CC	CT	1
3	164312599	AA	AG	1
3	164857739	GG	GC	1
3	164904273	CC	CT	1
3	166801690	TT	TG	1
3	167745679	CC	CG	1
3	168724329	CC	CT	1
3	171054797	TT	TC	1
3	171839209	GG	GT	1
3	171856085	AA	AC	1
3	172697721	GG	GT	1
3	172697722	AA	AG	1
3	175250111	GG	GT	1
3	176417555	GG	GA	1
3	178525498	TT	TA	1
3	178986201	AA	AG	1
3	179063803	CC	CG	1
3	180077274	GG	GA	1
3	180821256	TT	TA	1
3	181292605	GG	GC	1
3	181541708	AA	AC	1
3	181714627	GG	GC	1
3	182813487	CC	CT	1
3	183688065	GG	GA	1
3	183745375	GG	GA	1
3	184246586	TT	TA	1
3	184386346	GG	GT	1
3	184550480	GG	GA	1
3	184578671	GG	GA	1
3	184601567	CC	CT	1
3	184991154	GG	GA	1
3	185088847	GG	GT	1
3	185787586	CC	CT	1
3	185811454	TT	TA	1
3	187511437	GG	GA	1
3	187870671	AA	AC	1
3	188701531	GG	GT	1
3	189401643	CC	CG	1
3	190644447	TT	TA	1
3	191026751	CC	CA	1
3	191026752	CC	CA	1
3	192054232	TT	TA	1
3	192395229	GG	GA	1
3	192839020	AA	AC	1
3	192853595	GG	GA	1
3	194061714	GG	GA	1
3	194410543	TT	TC	1
3	194886875	TT	TC	1
3	195054093	GG	GC	1
3	195218551	GG	GT	1
3	195511477	CC	CG	1
3	195704558	CC	CG	1
3	195975787	CC	CT	1
3	196061017	AA	AG	1
3	196427760	GG	GA	1
3	196826451	GG	GA	1
3	197217409	CC	CT	1
3	197461325	TT	TG	1
4	485161	CC	CT	1
4	1715549	GG	GA	1
4	2224462	TT	TC	1
4	2278297	CC	CG	1
4	2344729	GG	GA	1
4	2929985	CC	CT	1
4	4580487	AA	AT	1
4	4581359	TT	TC	1
4	4962437	CC	CG	1
4	5531526	TT	TA	1
4	5567354	CC	CT	1
4	5935759	AA	AT	1
4	6170710	GG	GC	1
4	6483264	AA	AC	1
4	6528500	GG	GT	1
4	6694953	CC	CG	1
4	6728240	CC	CT	1
4	6760952	GG	GA	1
4	7038017	CC	CA	1
4	7247447	GG	GA	1
4	7399157	TT	TG	1
4	7855767	GG	GT	1
4	8319525	TT	TG	1
4	8534171	CC	CT	1
4	9863279	CC	CA	1
4	10827258	CC	CT	1
4	11087003	CC	CA	1
4	11288009	GG	GC	1
4	11292182	TT	TA	1
4	11326895	CC	CA	1
4	11375442	AA	AG	1
4	11543236	GG	GT	1
4	11569183	GG	GT	1
4	11781798	GG	GT	1
4	12560473	GG	GA	1
4	12570873	GG	GT	1
4	12711122	CC	CA	1
4	12739206	CC	CG	1
4	12763673	GG	GA	1
4	12980660	CC	CG	1
4	13462031	GG	GT	1
4	13493455	CC	CT	1
4	13805725	GG	GA	1
4	14117875	CC	CA	1
4	14515805	GG	GA	1
4	14646677	AA	AC	1
4	15728713	GG	GT	1
4	16069523	GG	GA	1
4	16251478	GG	GC	1
4	16803425	AA	AC	1
4	17066751	GG	GA	1
4	17331189	TT	TC	1
4	17804917	GG	GA	1
4	19086692	CC	CT	1
4	19434446	TT	TC	1
4	21230322	AA	AT	1
4	21522002	AA	AC	1
4	21691865	TT	TA	1
4	21774111	CC	CT	1
4	22283558	TT	TG	1
4	23963544	GG	GC	1
4	24455711	GG	GT	1
4	24889177	CC	CT	1
4	25307446	GG	GA	1
4	25419295	GG	GC	1
4	25621825	TT	TA	1
4	25676730	TT	TA	1
4	26251735	GG	GC	1
4	26505471	GG	GA	1
4	26948627	GG	GC	1
4	27093024	CC	CG	1
4	27242698	AA	AC	1
4	27937081	GG	GC	1
4	28070404	AA	AT	1
4	28809419	AA	AG	1
4	30066767	AA	AC	1
4	30535576	CC	CG	1
4	32239881	GG	GA	1
4	35208169	TT	TC	1
4	35449125	AA	AG	1
4	36338773	CC	CG	1
4	36940971	CC	CT	1
4	37752285	TT	TC	1
4	37955399	GG	GC	1
4	37961354	CC	CT	1
4	40616688	CC	CA	1
4	40746734	TT	TA	1
4	41284479	CC	CA	1
4	41657745	CC	CT	1
4	41822361	GG	GA	1
4	43588611	CC	CT	1
4	43647544	CC	CA	1
4	44487783	GG	GA	1
4	45167341	CC	CT	1
4	45813767	CC	CG	1
4	46190820	CC	CA	1
4	46538445	GG	GC	1
4	47384254	GG	GA	1
4	47545374	CC	CT	1
4	49086228	CC	CT	1
4	49248314	TT	TC	1
4	52922922	CC	CT	1
4	53706162	GG	GT	1
4	53706171	GG	GT	1
4	54790286	GG	GA	1
4	55584742	GG	GA	1
4	55709882	GG	GC	1
4	55779718	CC	CG	1
4	56075599	AA	AC	1
4	56175684	GG	GA	1
4	57399829	AA	AG	1
4	57551129	CC	CG	1
4	57611374	GG	GA	1
4	58325269	AA	AG	1
4	59362625	GG	GT	1
4	60110047	GG	GT	1
4	61148536	CC	CG	1
4	61345954	CC	CT	1
4	61749233	GG	GT	1
4	61812892	CC	CA	1
4	62004446	TT	TA	1
4	62411753	GG	GT	1
4	62837785	AA	AT	1
4	63021410	CC	CT	1
4	64210940	GG	GA	1
4	64669624	CC	CA	1
4	66401116	TT	TC	1
4	66603868	GG	GA	1
4	66971626	CC	CT	1
4	68843141	TT	TC	1
4	70294517	AA	AC	1
4	71033657	TT	TC	1
4	71870800	TT	TA	1
4	72537333	GG	GT	1
4	72942154	CC	CT	1
4	73129400	TT	TC	1
4	73521309	GG	GT	1
4	74008403	AA	AC	1
4	75830736	CC	CT	1
4	75959985	CC	CA	1
4	76381518	TT	TC	1
4	77826620	TT	TA	1
4	78063411	AA	AG	1
4	78149699	TT	TG	1
4	78199835	CC	CA	1
4	78981947	AA	AG	1
4	80551736	CC	CT	1
4	80923366	GG	GA	1
4	80923473	TT	TC	1
4	81000029	TT	TC	1
4	81101812	AA	AC	1
4	81527269	CC	CA	1
4	81562848	GG	GA	1
4	82047862	AA	AC	1
4	84382416	TT	TC	1
4	84646868	TT	TA	1
4	85229633	GG	GC	1
4	85796410	GG	GC	1
4	86001962	TT	TA	1
4	87554384	TT	TG	1
4	89831556	AA	AC	1
4	90005633	AA	AC	1
4	90047833	TT	TA	1
4	90442884	CC	CT	1
4	90537834	GG	GA	1
4	92302770	AA	AC	1
4	93611772	AA	AC	1
4	95308422	TT	TG	1
4	96279529	CC	CA	1
4	96673998	TT	TC	1
4	96821973	GG	GA	1
4	97237706	GG	GT	1
4	97741983	TT	TC	1
4	99091666	GG	GA	1
4	99349029	AA	AT	1
4	100007057	GG	GA	1
4	100498929	TT	TG	1
4	100934127	GG	GA	1
4	101746836	CC	CT	1
4	102048469	AA	AC	1
4	102111083	GG	GT	1
4	102375650	CC	CG	1
4	102538267	CC	CA	1
4	102677978	AA	AG	1
4	103655623	GG	GA	1
4	103995767	AA	AC	1
4	104546871	GG	GA	1
4	104694702	TT	TG	1
4	106213458	GG	GA	1
4	106226390	TT	TG	1
4	106454125	GG	GT	1
4	108074603	GG	GA	1
4	109254952	AA	AC	1
4	109261049	AA	AC	1
4	109877649	CC	CT	1
4	110077582	AA	AT	1
4	111563537	AA	AT	1
4	111817309	CC	CA	1
4	112013742	AA	AT	1
4	112207463	TT	TG	1
4	114815838	TT	TA	1
4	116528366	CC	CA	1
4	117919707	GG	GA	1
4	119435008	TT	TG	1
4	119794030	CC	CT	1
4	119924348	CC	CG	1
4	119925490	CC	CT	1
4	120556360	AA	AT	1
4	120768873	GG	GT	1
4	121344751	TT	TG	1
4	121608630	GG	GT	1
4	121767537	AA	AC	1
4	121954942	GG	GC	1
4	122012588	CC	CA	1
4	122935510	CC	CT	1
4	123186743	GG	GA	1
4	123297403	AA	AC	1
4	123298703	AA	AG	1
4	123569138	GG	GA	1
4	124788593	TT	TG	1
4	124847094	CC	CA	1
4	126416546	CC	CA	1
4	127994322	AA	AT	1
4	128280798	GG	GA	1
4	128342062	GG	GC	1
4	128586837	TT	TG	1
4	129679305	GG	GC	1
4	130570668	TT	TG	1
4	131055973	GG	GC	1
4	132194846	GG	GA	1
4	132484515	GG	GC	1
4	133771968	TT	TC	1
4	134160021	AA	AC	1
4	135633475	AA	AG	1
4	136788631	GG	GC	1
4	138299767	TT	TG	1
4	138604628	AA	AT	1
4	138694371	TT	TG	1
4	138864904	AA	AT	1
4	139555552	TT	TC	1
4	139606140	GG	GA	1
4	140708437	TT	TA	1
4	141501018	GG	GA	1
4	142509799	GG	GA	1
4	142784929	AA	AC	1
4	142808886	GG	GA	1
4	142868763	TT	TA	1
4	143302606	CC	CT	1
4	143630008	CC	CG	1
4	143811093	CC	CT	1
4	143963959	TT	TG	1
4	144093592	TT	TG	1
4	144338117	AA	AG	1
4	144633930	CC	CT	1
4	145143249	CC	CA	1
4	146062810	GG	GC	1
4	146801948	TT	TG	1
4	147793105	GG	GC	1
4	148459799	GG	GT	1
4	150052992	GG	GA	1
4	150416205	AA	AG	1
4	150937037	GG	GA	1
4	151048542	CC	CA	1
4	151873775	GG	GA	1
4	151895334	AA	AT	1
4	152087645	AA	AT	1
4	152390601	GG	GC	1
4	152622207	CC	CG	1
4	152744210	CC	CG	1
4	153147207	GG	GC	1
4	154729929	TT	TA	1
4	155059244	GG	GC	1
4	155166598	GG	GA	1
4	155475183	TT	TG	1
4	156000409	CC	CT	1
4	156143224	CC	CA	1
4	156315224	GG	GC	1
4	157162444	GG	GC	1
4	157473291	AA	AG	1
4	157525551	CC	CT	1
4	157754467	GG	GC	1
4	157958983	AA	AG	1
4	157970693	AA	AT	1
4	158067236	TT	TA	1
4	159149255	CC	CA	1
4	159315702	CC	CA	1
4	160198226	TT	TC	1
4	160366290	GG	GT	1
4	160887928	GG	GA	1
4	161590149	CC	CA	1
4	161848709	CC	CA	1
4	162783819	GG	GA	1
4	163237941	GG	GC	1
4	163378602	CC	CT	1
4	164390857	TT	TC	1
4	165163902	TT	TA	1
4	165163915	CC	CA	1
4	165640029	TT	TA	1
4	165739142	AA	AC	1
4	165853603	GG	GA	1
4	166272768	GG	GC	1
4	167384733	CC	CT	1
4	167790467	CC	CA	1
4	168490703	CC	CG	1
4	169354967	AA	AG	1
4	170210362	CC	CG	1
4	170884617	GG	GA	1
4	171734954	GG	GC	1
4	171885859	GG	GT	1
4	171890433	CC	CT	1
4	172167578	GG	GT	1
4	172291510	GG	GT	1
4	172803925	AA	AC	1
4	173988072	AA	AG	1
4	174237288	CC	CT	1
4	175511328	GG	GC	1
4	175914540	AA	AC	1
4	177733798	GG	GT	1
4	177761969	GG	GT	1
4	177814514	TT	TG	1
4	178021818	CC	CG	1
4	178101467	TT	TA	1
4	178612145	GG	GT	1
4	179212650	GG	GT	1
4	179408859	TT	TG	1
4	179559519	CC	CT	1
4	179782847	CC	CT	1
4	179812463	GG	GA	1
4	180120948	CC	CT	1
4	180142199	GG	GT	1
4	181628609	CC	CA	1
4	181814268	CC	CA	1
4	181941304	TT	TC	1
4	182609927	TT	TG	1
4	182632940	GG	GC	1
4	182777784	CC	CT	1
4	182887252	CC	CA	1
4	182974010	AA	AT	1
4	183186235	CC	CT	1
4	183328339	AA	AG	1
4	183694987	AA	AG	1
4	183836395	AA	AC	1
4	183919946	GG	GA	1
4	184440472	GG	GA	1
4	184739066	CC	CG	1
4	184894232	AA	AT	1
4	184930787	TT	TA	1
4	185044071	CC	CT	1
4	185162935	GG	GA	1
4	186124153	GG	GC	1
4	187277633	GG	GA	1
4	188050400	TT	TC	1
4	188098437	CC	CA	1
4	188297494	CC	CT	1
4	188895236	GG	GA	1
4	189295806	TT	TG	1
4	190186452	AA	AT	1
4	190662781	GG	GA	1
4	190685417	GG	GA	1
5	157584	GG	TT	2
5	1266926	CC	CA	1
5	1464554	CC	CA	1
5	2249881	GG	GA	1
5	2544805	CC	CT	1
5	3191499	GG	GT	1
5	3202877	CC	CT	1
5	3643921	AA	AG	1
5	4015783	GG	GA	1
5	4310215	GG	GA	1
5	4651064	GG	GT	1
5	5082877	CC	CT	1
5	5409507	GG	GA	1
5	5978034	AA	AT	1
5	6005307	TT	TC	1
5	6399891	AA	AT	1
5	6941483	CC	CT	1
5	6961878	GG	GA	1
5	7307307	CC	CT	1
5	7317799	TT	TC	1
5	7416429	CC	CT	1
5	7436322	GG	GC	1
5	8342041	GG	GC	1
5	9059761	AA	AC	1
5	9108667	AA	AG	1
5	9265575	CC	CA	1
5	9802798	AA	AG	1
5	10286200	GG	GC	1
5	12522515	TT	TG	1
5	13479436	TT	TA	1
5	14058190	TT	TA	1
5	14478871	TT	TG	1
5	14730536	GG	GT	1
5	15249393	CC	CG	1
5	15307748	GG	GT	1
5	15817190	CC	CT	1
5	15823899	AA	AC	1
5	17186043	TT	TG	1
5	17468429	GG	GA	1
5	18293638	GG	GT	1
5	19476457	GG	GA	1
5	20298908	CC	CT	1
5	21102948	GG	GC	1
5	21242888	AA	AT	1
5	21281017	CC	CT	1
5	21545072	AA	AC	1
5	21684246	GG	GA	1
5	21921255	GG	GA	1
5	21921258	GG	GA	1
5	22008638	TT	TC	1
5	22734180	TT	TC	1
5	22747845	GG	GT	1
5	23640582	GG	GT	1
5	24414876	TT	TC	1
5	24421630	GG	GT	1
5	24505232	GG	GC	1
5	24749832	GG	GC	1
5	24792887	GG	GC	1
5	25120044	AA	AC	1
5	25364605	CC	CT	1
5	25546427	AA	AC	1
5	26581167	AA	AC	1
5	26937838	TT	TC	1
5	26992921	TT	TA	1
5	27118652	CC	CG	1
5	27151732	GG	GT	1
5	27519691	CC	CG	1
5	28045045	TT	TA	1
5	28422848	AA	AC	1
5	28819309	GG	GA	1
5	29186183	GG	GT	1
5	29305360	AA	AG	1
5	29305363	GG	GT	1
5	29305400	GG	GT	1
5	29727697	TT	TC	1
5	30160702	AA	AT	1
5	30704116	GG	GT	1
5	30799701	GG	GA	1
5	31010143	TT	TC	1
5	31081409	AA	AT	1
5	31102482	AA	AT	1
5	31360349	TT	TC	1
5	31367759	AA	AC	1
5	31395556	AA	AG	1
5	32645982	AA	AC	1
5	33620752	TT	TC	1
5	34225741	GG	GC	1
5	35287678	AA	AG	1
5	35565582	CC	CT	1
5	36034244	CC	CT	1
5	36152983	CC	CT	1
5	38928081	TT	TC	1
5	39350749	CC	CA	1
5	39906060	GG	GC	1
5	40150927	AA	AG	1
5	40437343	CC	CT	1
5	40453275	TT	TC	1
5	41413853	GG	GC	1
5	41547373	CC	CT	1
5	41887564	AA	AT	1
5	43336580	TT	TG	1
5	43523415	AA	AC	1
5	43956813	TT	TG	1
5	44155951	GG	GC	1
5	44380145	GG	GA	1
5	45412092	CC	CG	1
5	45908733	CC	CT	1
5	49424591	GG	GT	1
5	49698551	GG	GC	1
5	50390698	CC	CT	1
5	51122758	TT	TA	1
5	51994855	CC	CT	1
5	53384961	AA	AC	1
5	53922179	GG	T	1
5	57704061	CC	T	1
5	57902183	CC	A	1
5	58183322	GG	A	1
5	60303112	AA	T	1
5	61041435	GG	C	1
5	61119395	GG	A	1
5	62676813	CC	T	1
5	65844375	TT	C	1
5	67988362	GG	A	1
5	68297904	TT	A	1
5	68381436	AA	T	1
5	71815346	TT	A	1
5	73522140	AA	G	1
5	75640510	GG	C	1
5	81580741	CC	G	1
5	81596661	GG	A	1
5	83052067	CC	G	1
5	83740060	GG	T	1
5	84046748	CC	T	1
5	84103707	AA	C	1
5	84179138	AA	G	1
5	84259255	TT	C	1
5	88459687	GG	A	1
5	89506914	CC	T	1
5	89887552	TT	A	1
5	90298346	AA	G	1
5	90575912	GG	A	1
5	90961062	AA	C	1
5	96065521	AA	G	1
5	96165566	TT	C	1
5	96234247	CC	T	1
5	102142727	GG	C	1
5	103109444	CC	T	1
5	106190597	TT	C	1
5	106242683	AA	C	1
5	106891285	CC	A	1
5	107076526	GG	C	1
5	107595722	TT	A	1
5	108991177	AA	C	1
5	109101934	AA	C	1
5	110271365	GG	C	1
5	112645028	CC	T	1
5	115988994	AA	T	1
5	116140539	CC	T	1
5	116242978	AA	T	1
5	116936939	CC	T	1
5	116978904	TT	G	1
5	117266998	GG	A	1
5	117825804	CC	T	1
5	120529275	GG	A	1
5	123779377	AA	T	1
5	124778158	AA	G	1
5	125107176	GG	A	1
5	125873992	AA	C	1
5	126523510	GG	A	1
5	126851201	GG	T	1
5	127476521	TT	A	1
5	128043451	TT	C	1
5	129909267	CC	A	1
5	131646304	TT	A	1
5	132841313	AA	G	1
5	135993765	CC	T	1
5	136448627	GG	A	1
5	136847944	GG	T	1
5	137737468	CC	T	1
5	139907205	TT	C	1
5	140349311	GG	GGGA	1
5	140371345	CC	CCTT	2
5	140396789	GG	GGGA	1
5	140568154	CC	CCCT	1
5	140898943	GG	GGCC	2
5	140983614	CC	CCCA	1
5	140983616	CC	CCCA	1
5	141130491	GG	GGGA	1
5	141168419	TT	TTTA	1
5	141180696	TT	CCCC	4
5	142413856	GG	AA	2
5	142465275	CC	CA	1
5	143801607	TT	CC	2
5	145366812	GG	GGC	1
5	145803368	CC	CGG	2
5	145971878	GG	GGC	1
5	146169330	CC	CCA	1
5	146206998	GG	GAA	2
5	147129187	AA	AAC	1
5	148056987	TT	TA	1
5	148286643	GG	GA	1
5	148768775	CC	GG	2
5	148840785	CC	CT	1
5	148960250	TT	TG	1
5	148975019	CC	AA	2
5	149090070	CC	CA	1
5	149791742	GG	GC	1
5	150450458	AA	AC	1
5	150957555	CC	CA	1
5	151598368	CC	CT	1
5	151822205	GG	GT	1
5	152039228	GG	GC	1
5	152758032	AA	AC	1
5	153002147	AA	AC	1
5	153283177	TT	AA	2
5	153866600	AA	AC	1
5	154263595	CC	CT	1
5	155475321	GG	GAA	2
5	155648213	GG	GGT	1
5	155674228	GG	GGC	1
5	155684719	CC	CCA	1
5	155808723	GG	GGT	1
5	155873906	GG	GTT	2
5	158057535	CC	CA	1
5	158255300	GG	GT	1
5	158374111	TT	CC	2
5	159112324	TT	TG	1
5	159269952	TT	TC	1
5	159631591	GG	AA	2
5	160569867	GG	GC	1
5	160727295	CC	AA	2
5	162145421	CC	CT	1
5	162244176	TT	TA	1
5	163200381	AA	AT	1
5	164147839	CC	CCA	1
5	164229604	TT	TTA	1
5	164242533	CC	CCA	1
5	164502194	GG	GGC	1
5	164679520	TT	TTG	1
5	164845704	GG	GGT	1
5	165051649	CC	CTT	2
5	165311155	CC	CCA	1
5	165332243	TT	TTG	1
5	165475893	TT	TTA	1
5	165552015	TT	TTG	1
5	165911672	CC	CCT	1
5	165933225	CC	CCG	1
5	165965698	GG	GGC	1
5	165967045	GG	GGC	1
5	165967316	GG	GGC	1
5	165967396	GG	GGC	1
5	166182992	TT	TTA	1
5	166512099	AA	ATT	2
5	166539363	CC	CCA	1
5	166931846	GG	GGT	1
5	167143030	TT	TTG	1
5	167416999	CC	CCG	1
5	168230020	GG	GC	1
5	169223554	CC	G	1
5	169464921	GG	GGT	1
5	169548461	CC	CAA	2
5	170042302	CC	CCT	1
5	170042490	CC	CCT	1
5	170933875	CC	CCG	1
5	171025391	GG	GGT	1
5	171652840	TT	TAA	2
5	172132677	AA	AAC	1
5	172616937	AA	AAC	1
5	172680244	AA	GGG	3
5	172990418	CC	CTT	2
5	173028843	AA	AAT	1
5	173155207	TT	TTG	1
5	173556765	TT	TTG	1
5	173577473	CC	CCG	1
5	173624840	CC	CCT	1
5	173624912	CC	CCG	1
5	173624991	CC	CCG	1
5	173625014	CC	CCG	1
5	173625029	CC	CCA	1
5	173625034	CC	CCT	1
5	173625067	CC	CCG	1
5	173625118	CC	CCT	1
5	173625182	CC	CCT	1
5	173625332	CC	CCT	1
5	173625405	CC	CCG	1
5	173625577	CC	CCG	1
5	173625595	CC	CCG	1
5	173626298	CC	CGG	2
5	173626444	CC	CCG	1
5	173773460	CC	CCT	1
5	174195458	GG	GGC	1
5	174750052	TT	TTG	1
5	174972492	GG	GGA	1
5	175284293	AA	AAC	1
5	175796583	CC	CGG	2
5	175973652	CC	CCG	1
5	176490916	TT	TTC	1
5	177138582	TT	TTG	1
5	177213825	AA	AAC	1
5	177466654	AA	AGG	2
5	177691031	TT	TTC	1
5	177693558	CC	CCG	1
5	177717218	CC	CTT	2
5	178312550	TT	TTG	1
5	178684216	GG	GGA	1
5	178812791	TT	AAA	3
5	178856480	TT	TTG	1
5	179325151	AA	AAT	1
5	180078452	CC	CGG	2
5	180180322	CC	CCG	1
6	531639	TT	TA	1
6	707445	CC	CA	1
6	809392	GG	GA	1
6	958202	CC	CT	1
6	1772217	TT	TA	1
6	1995738	CC	CG	1
6	2352290	GG	GT	1
6	3462800	GG	GA	1
6	3608676	AA	AC	1
6	3885594	TT	TA	1
6	4267751	TT	TG	1
6	4440383	TT	TA	1
6	4440386	TT	AA	2
6	4612930	CC	CG	1
6	6714648	AA	AG	1
6	6953809	CC	CG	1
6	6969369	AA	AC	1
6	7795259	TT	TA	1
6	7881115	GG	GA	1
6	7909003	GG	GC	1
6	8376819	CC	CA	1
6	8498850	AA	AC	1
6	10302749	CC	CT	1
6	11208400	GG	GC	1
6	11242573	GG	GC	1
6	11423312	TT	TA	1
6	11448641	GG	GC	1
6	12154355	GG	GA	1
6	12301701	CC	CG	1
6	13065945	CC	CG	1
6	13923152	CC	CA	1
6	14107994	GG	GC	1
6	14217547	CC	CA	1
6	14551200	GG	GT	1
6	15279227	CC	CG	1
6	15501840	AA	AT	1
6	15821229	CC	CA	1
6	15910243	TT	TC	1
6	16266340	CC	CT	1
6	16266342	TT	TC	1
6	16599297	GG	GC	1
6	16644347	CC	CA	1
6	16672892	AA	AC	1
6	16672893	CC	CA	1
6	16868581	TT	TG	1
6	17297822	TT	TC	1
6	17622342	TT	TC	1
6	17711574	GG	GT	1
6	18643697	TT	TC	1
6	18997318	CC	CT	1
6	19052025	GG	GA	1
6	19097192	CC	CT	1
[truncated: 3,257 more rows]

## Sheet: PD3904 Segs
Segment	Chr	Start	Finish	Len	TotalCN	Minor	Major	1	2	3	4	5	6
1	1	564621	26527163	25.9625	2	1	1	36	0	0	0	0	0
2	1	26527163	58806965	32.2798	1	0	1	28	0	0	0	0	0
3	1	58807217	58826916	0.019699	2	0	2	0	0	0	0	0	0
4	1	58827046	108202710	49.3757	2	1	1	99	0	0	0	0	0
5	1	108202879	108356000	0.153121	3	1	2	0	0	0	0	0	0
6	1	108356000	199691458	91.3355	2	1	1	133	0	0	0	0	0
7	1	199700152	207874272	8.17412	3	1	2	19	0	0	0	0	0
8	1	207875175	208589905	0.71473	3	0	3	5	1	0	0	0	0
9	1	208593803	211621615	3.02781	3	1	2	12	0	0	0	0	0
10	1	211641950	249198692	37.5567	2	1	1	80	0	0	0	0	0
11	2	564621	10008872	9.44425	2	1	1	16	0	0	0	0	0
12	2	10008872	20605249	10.5964	3	1	2	23	10	0	0	0	0
13	2	20605500	34691069	14.0856	2	1	1	28	0	0	0	0	0
14	2	34699315	34721559	0.022244	0	0	0	0	0	0	0	0	0
15	2	34737163	34792917	0.055754	2	0	2	1	0	0	0	0	0
16	2	34796055	89130009	54.334	2	1	1	107	0	0	0	0	0
17	2	89130009	89313936	0.183927	4	1	3	0	0	0	0	0	0
18	2	89313936	242725752	153.412	2	1	1	293	0	0	0	0	0
19	2	242917306	243048760	0.131454	1	0	1	0	0	0	0	0	0
20	3	564621	16873603	16.309	3	1	2	27	14	0	0	0	0
21	3	16873603	17895232	1.02163	3	0	3	3	0	0	0	0	0
22	3	17908548	18905739	0.997191	3	1	2	3	4	0	0	0	0
23	3	18906323	113614489	94.7082	2	1	1	175	0	0	0	0	0
24	3	113614489	114110629	0.49614	3	1	2	2	0	0	0	0	0
25	3	114111407	197856433	83.745	2	1	1	156	0	0	0	0	0
26	4	564621	10210390	9.64577	2	1	1	24	0	0	0	0	0
27	4	10210390	10210390	0	0	0	0	0	0	0	0	0	0
28	4	10210390	10210390	0	2	0	2	0	0	0	0	0	0
29	4	10236142	190951965	180.716	2	1	1	334	0	0	0	0	0
30	5	564621	53672849	53.1082	2	1	1	112	0	0	0	0	0
31	5	53672849	140068547	86.3957	1	0	1	67	0	0	0	0	0
32	5	140068547	141623022	1.55448	4	0	4	7	2	0	1	0	0
33	5	141625408	145256412	3.631	2	0	2	1	2	0	0	0	0
34	5	145264397	147480523	2.21613	3	0	3	4	2	0	0	0	0
35	5	147480556	154607639	7.12708	2	0	2	15	3	0	0	0	0
36	5	154607639	156679576	2.07194	3	0	3	4	2	0	0	0	0
37	5	156680629	163671150	6.99052	2	0	2	8	3	0	0	0	0
38	5	163673109	167537032	3.86392	3	0	3	21	2	0	0	0	0
39	5	167537519	168591300	1.05378	2	0	2	1	0	0	0	0	0
40	5	168591532	169448320	0.856788	1	0	1	1	0	0	0	0	0
41	5	169450011	180696889	11.2469	3	0	3	41	8	2	0	0	0
42	6	564621	24739372	24.1748	2	0	2	64	3	0	0	0	0
43	6	24739372	65168050	40.4287	1	0	1	32	0	0	0	0	0
44	6	65168050	65168050	0	5	0	5	0	0	0	0	0	0
45	6	65168050	65558681	0.390631	2	1	1	0	0	0	0	0	0
46	6	65558681	77422497	11.8638	1	0	1	7	0	0	0	0	0
47	6	77422497	77452804	0.030307	0	0	0	0	0	0	0	0	0
48	6	77461073	78962626	1.50155	1	0	1	0	0	0	0	0	0
49	6	78962626	79026686	0.06406	0	0	0	0	0	0	0	0	0
50	6	79039234	170918031	91.8788	1	0	1	81	0	0	0	0	0
51	7	564621	825836	0.261215	1	0	1	1	0	0	0	0	0
52	7	825836	837407	0.011571	2	0	2	0	0	0	0	0	0
53	7	837407	159119220	158.282	2	1	1	339	0	0	0	0	0
54	8	564621	18846803	18.2822	1	0	1	21	0	0	0	0	0
55	8	18846803	18858287	0.011484	0	0	0	0	0	0	0	0	0
56	8	18858287	35041361	16.1831	1	0	1	16	0	0	0	0	0
57	8	35041361	35041361	0	4	0	4	0	0	0	0	0	0
58	8	35041361	36888561	1.8472	3	1	2	4	1	0	0	0	0
59	8	36888561	38428657	1.5401	6	1	5	20	4	6	0	0	0
60	8	38429372	39136231	0.706859	4	1	3	1	1	0	0	0	0
61	8	39136551	39943600	0.807049	2	1	1	0	0	0	0	0	0
62	8	39944511	40923349	0.978838	3	1	2	1	1	0	0	0	0
63	8	40923349	41193644	0.270295	1	0	1	0	0	0	0	0	0
64	8	41193644	41193644	0	6	0	6	0	0	0	0	0	0
65	8	41193644	41455579	0.261935	3	1	2	1	0	0	0	0	0
66	8	41455579	41786491	0.330912	2	1	1	0	0	0	0	0	0
67	8	41786491	42140804	0.354313	3	1	2	1	3	0	0	0	0
68	8	42141385	42141385	0	0	0	0	0	0	0	0	0	0
69	8	42141385	42301991	0.160606	2	0	2	2	0	0	0	0	0
70	8	42301991	43778914	1.47692	4	1	3	6	5	2	0	0	0
71	8	43778914	48454711	4.6758	2	1	1	4	0	0	0	0	0
72	8	48454711	52945956	4.49125	3	1	2	6	4	0	0	0	0
73	8	52945956	53111052	0.165096	5	0	5	0	0	1	0	0	0
74	8	53111074	56360234	3.24916	5	2	3	9	4	0	0	0	0
75	8	56363564	58433184	2.06962	4	2	2	6	1	0	0	0	0
76	8	58449229	58850135	0.400906	5	0	5	2	0	0	0	0	0
77	8	58850135	59623189	0.773054	6	2	4	8	1	0	1	0	0
78	8	59623189	60984213	1.36102	4	2	2	8	2	0	0	0	0
79	8	60998730	61788144	0.789414	5	2	3	3	0	1	0	0	0
80	8	61788144	62710351	0.922207	6	2	4	4	1	0	0	0	0
81	8	62710351	63344205	0.633854	4	2	2	7	2	0	0	0	0
82	8	63352500	64495277	1.14278	6	2	4	11	0	0	0	0	0
83	8	64498360	65934736	1.43638	4	2	2	8	1	0	0	0	0
84	8	65941449	66449457	0.508008	5	2	3	2	1	0	0	0	0
85	8	66449457	69765125	3.31567	4	2	2	20	3	0	0	0	0
86	8	69765125	76352578	6.58745	3	1	2	11	5	0	0	0	0
87	8	76352578	77036578	0.684	4	0	4	0	1	0	0	0	0
88	8	77045275	146293414	69.2481	4	2	2	191	80	0	0	0	0
89	9	40910	141071475	141.031	2	1	1	207	0	0	0	0	0
90	10	564621	45308586	44.744	2	1	1	73	0	0	0	0	0
91	10	45308586	65816383	20.5078	1	0	1	16	0	0	0	0	0
92	10	65816383	66362059	0.545676	2	0	2	5	0	0	0	0	0
93	10	66364116	80843548	14.4794	2	1	1	26	0	0	0	0	0
94	10	80846655	86851682	6.00503	3	1	2	11	4	0	0	0	0
95	10	86860776	89327879	2.4671	2	1	1	5	0	0	0	0	0
96	10	89335977	93390680	4.0547	3	1	2	12	0	0	0	0	0
97	10	93390680	96919803	3.52912	1	0	1	2	0	0	0	0	0
98	10	96919803	97002308	0.082505	3	0	3	0	0	0	0	0	0
99	10	97002701	97182503	0.179802	3	1	2	0	0	0	0	0	0
100	10	97182503	99210911	2.02841	2	1	1	3	0	0	0	0	0
101	10	99210911	135434551	36.2236	1	0	1	34	0	0	0	0	0
102	11	198510	5778471	5.57996	1	0	1	2	0	0	0	0	0
103	11	5778471	5827317	0.048846	0	0	0	0	0	0	0	0	0
104	11	5829019	15890746	10.0617	1	0	1	5	0	0	0	0	0
105	11	15891161	15922302	0.031141	2	0	2	2	0	0	0	0	0
106	11	15923562	37459661	21.5361	2	1	1	54	0	0	0	0	0
107	11	37460292	65895166	28.4349	1	0	1	22	0	0	0	0	0
108	11	65898631	66064850	0.166219	4	0	4	1	0	0	0	0	0
109	11	66066664	67501626	1.43496	3	1	2	4	1	0	0	0	0
110	11	67502676	69910890	2.40821	2	1	1	8	0	0	0	0	0
111	11	69916269	75297884	5.38162	3	1	2	13	4	0	0	0	0
112	11	75305531	76752248	1.44672	1	0	1	1	0	0	0	0	0
113	11	76758592	76805777	0.047185	2	0	2	1	1	0	0	0	0
114	11	76805777	79991929	3.18615	4	1	3	16	1	1	0	0	0
115	11	79991929	129032694	49.0408	1	0	1	40	0	0	0	0	0
116	11	129054559	129260327	0.205768	2	0	2	0	0	0	0	0	0
117	11	129260327	134944770	5.68444	1	0	1	9	0	0	0	0	0
118	12	564621	133777645	133.213	2	1	1	283	0	0	0	0	0
119	13	564621	19426562	18.8619	2	0	2	1	0	0	0	0	0
120	13	19426562	54973243	35.5467	1	0	1	21	0	0	0	0	0
121	13	54973243	55039873	0.06663	3	0	3	0	0	0	0	0	0
122	13	55040059	55970733	0.930674	3	1	2	0	1	0	0	0	0
123	13	55970733	58583350	2.61262	1	0	1	3	0	0	0	0	0
124	13	58583350	58583350	0	5	0	5	0	0	0	0	0	0
125	13	58591107	59591041	0.999934	3	1	2	2	1	0	0	0	0
126	13	59591041	60163668	0.572627	1	0	1	0	0	0	0	0	0
127	13	60166033	60815418	0.649385	3	0	3	0	1	0	0	0	0
128	13	60818288	60918668	0.10038	3	1	2	0	0	0	0	0	0
129	13	60918668	67762288	6.84362	1	0	1	11	0	0	0	0	0
130	13	67762288	67762288	0	2	0	2	0	0	0	0	0	0
131	13	67777432	95894120	28.1167	3	1	2	62	12	0	0	0	0
132	13	95894315	115106996	19.2127	2	1	1	42	0	0	0	0	0
133	14	564621	63089209	62.5246	2	1	1	85	0	0	0	0	0
134	14	63089209	105523663	42.4345	1	0	1	42	0	0	0	0	0
135	14	105523817	105534432	0.010615	2	0	2	0	0	0	0	0	0
136	14	105536162	106194763	0.658601	2	1	1	1	0	0	0	0	0
137	14	106197115	106675615	0.4785	3	0	3	0	1	0	0	0	0
138	14	106675615	107285437	0.609822	2	1	1	2	0	0	0	0	0
139	15	564621	25199768	24.6351	2	1	1	9	0	0	0	0	0
140	15	25211810	27571843	2.36003	3	1	2	11	5	0	0	0	0
141	15	27572192	32301397	4.72921	2	1	1	7	0	0	0	0	0
142	15	32301397	49368940	17.0675	3	1	2	25	14	0	0	0	0
143	15	49368940	53369303	4.00036	4	1	3	14	1	1	0	0	0
144	15	53369450	53972484	0.603034	4	0	4	2	0	0	0	0	0
145	15	53974301	71723603	17.7493	4	1	3	45	18	1	0	0	0
146	15	71730010	102400037	30.67	2	1	1	66	0	0	0	0	0
147	16	564621	78425790	77.8612	2	1	1	128	0	0	0	0	0
148	16	78425862	78712617	0.286755	2	0	2	0	0	0	0	0	0
149	16	78713067	90163275	11.4502	2	1	1	16	0	0	0	0	0
150	17	564621	20029901	19.4653	1	0	1	17	0	0	0	0	0
151	17	20030960	20030960	0	2	0	2	0	0	0	0	0	0
152	17	20086562	36747519	16.661	2	1	1	36	0	0	0	0	0
153	17	36747519	81049726	44.3022	3	1	2	128	14	0	0	0	0
154	18	11543	5849154	5.83761	1	0	1	8	0	0	0	0	0
155	18	5849154	8002993	2.15384	0	0	0	0	0	0	0	0	0
156	18	8002993	13186765	5.18377	1	0	1	7	0	0	0	0	0
157	18	13198053	13271319	0.073266	4	0	4	1	0	0	0	0	0
158	18	13272295	15075994	1.8037	4	1	3	6	2	0	0	0	0
159	18	15075994	34126815	19.0508	3	1	2	34	14	0	0	0	0
160	18	34127383	34829958	0.702575	3	0	3	0	0	0	0	0	0
161	18	34829958	40941077	6.11112	2	1	1	14	0	0	0	0	0
162	18	40941077	41710757	0.76968	1	0	1	2	0	0	0	0	0
163	18	41710757	41837838	0.127081	2	0	2	2	0	0	0	0	0
164	18	41839227	47243912	5.40468	2	1	1	9	0	0	0	0	0
165	18	47243912	48594898	1.35099	1	0	1	1	0	0	0	0	0
166	18	48594898	48594898	0	3	0	3	0	0	0	0	0	0
167	18	48594898	51732258	3.13736	2	1	1	9	0	0	0	0	0
168	18	51735711	54069099	2.33339	3	1	2	2	2	0	0	0	0
169	18	54069099	54104333	0.035234	5	1	4	0	0	0	0	0	0
170	18	54116485	54665772	0.549287	5	2	3	4	0	0	0	0	0
171	18	54665772	78015057	23.3493	2	0	2	27	7	0	0	0	0
172	19	564621	59095126	58.5305	2	1	1	104	0	0	0	0	0
173	20	564621	1559989	0.995368	2	1	1	4	0	0	0	0	0
174	20	1559989	1559989	0	0	0	0	0	0	0	0	0	0
175	20	1559989	1599142	0.039153	3	0	3	0	0	0	0	0	0
176	20	1599142	34227153	32.628	2	1	1	66	0	0	0	0	0
177	20	34228680	52643155	18.4145	3	1	2	49	11	0	0	0	0
178	20	52647808	52654547	0.006739	0	0	0	0	0	0	0	0	0
179	20	52657717	52658593	0.000876	2	0	2	0	0	0	0	0	0
180	20	52658593	62912463	10.2539	3	1	2	27	2	0	0	0	0
181	21	564621	48084820	47.5202	2	1	1	68	0	0	0	0	0
182	22	564621	51219006	50.6544	2	1	1	71	0	0	0	0	0
